1 **A universal influenza mRNA vaccine candidate boosts T-cell responses and reduces**  
2 **zoonotic influenza virus disease in ferrets**

3

4 Koen van de Ven<sup>1</sup>, Josien Lanfermeijer<sup>1,2</sup>, Harry van Dijken<sup>1</sup>, Hiromi Muramatsu<sup>3</sup>, Caroline Vilas Boas  
5 de Melo<sup>1</sup>, Stefanie Lenz<sup>1</sup>, Florence Peters<sup>1</sup>, Mitchell B Beattie<sup>4</sup>, Paulo J C Lin<sup>4</sup>, José A. Ferreira<sup>5</sup>, Judith  
6 van den Brand<sup>6</sup>, Debbie van Baarle<sup>1,7</sup>, Norbert Pardi<sup>3\*</sup>, Jørgen de Jonge<sup>1\*</sup>

7

8 <sup>1</sup> Centre for Infectious Disease Control, National Institute for Public Health and the Environment  
9 (RIVM), Bilthoven, the Netherlands

10 <sup>2</sup> Center for Translational Immunology, University Medical Center Utrecht, Utrecht, Netherlands

11 <sup>3</sup> Department of Microbiology, University of Pennsylvania, Philadelphia, PA, USA

12 <sup>4</sup> Acuitas Therapeutics, Vancouver, BC V6T 1Z3, Canada.

13 <sup>5</sup> Department of Statistics, Informatics and Modelling, National Institute for Public Health and the  
14 Environment (RIVM), Bilthoven, The Netherlands.

15 <sup>6</sup> Division of Pathology, Faculty of Veterinary Medicine, Utrecht University, Utrecht, Netherlands.

16 <sup>7</sup> Department of Medical Microbiology and Infection prevention, Virology and Immunology research  
17 Group, University Medical Center Groningen, Groningen, Netherlands

18 \*correspondence should be sent to [pnorbert@pennmedicine.upenn.edu](mailto:pnorbert@pennmedicine.upenn.edu) and  
19 [jorgen.de.jonge@rivm.nl](mailto:jorgen.de.jonge@rivm.nl)

20

21

22 **Abstract**

23 Universal influenza vaccines have the potential to protect against continuously evolving and newly  
24 emerging influenza viruses. T cells may be an essential target of such vaccines as they can clear  
25 infected cells through recognition of conserved influenza virus epitopes. We evaluated a novel T cell-  
26 inducing nucleoside-modified mRNA vaccine that encodes the conserved nucleoprotein, matrix  
27 protein 1 and polymerase basic protein 1 of an H1N1 influenza virus. To mimic the human situation,  
28 we applied the mRNA vaccine as a prime-boost regimen in naïve ferrets (mimicking young children)  
29 and as a booster in influenza-experienced ferrets (mimicking adults). The vaccine induced and  
30 boosted broadly-reactive T cells in the circulation, bone marrow and respiratory tract. Booster  
31 vaccination enhanced protection against heterosubtypic infection with potential pandemic H7N9  
32 influenza virus in influenza-experienced ferrets. Our findings show that mRNA vaccines encoding  
33 internal influenza virus proteins are a promising strategy to induce broadly-protective T-cell  
34 immunity against influenza viruses.

## 35 Introduction

36

37 Influenza viruses infect 5-15% of the world population annually, resulting in approximately 290-650  
38 thousands of deaths worldwide [1, 2]. While vaccines mitigate influenza virus-induced morbidity and  
39 mortality, the effectiveness of inactivated influenza virus vaccines is insufficient [3-5]. These vaccines  
40 mainly induce strain-specific immunity and are therefore limited in their ability to protect against  
41 mutated or newly introduced influenza virus strains. Animal-to-human transmissions of influenza A  
42 viruses pose a particular risk, as seasonal influenza vaccination does not offer protection against  
43 these strains. There are ample examples of influenza viruses crossing the species barrier and causing  
44 a pandemic, with the Spanish flu of 1918 as the most dramatic known example [6, 7]. Recent  
45 zoonotic transmissions of highly pathogenic avian influenza virus – like H5N1 and H7N9 – have  
46 occurred frequently and are associated with high mortality rates [8, 9]. Especially alarming is the  
47 recent rise in outbreaks of these viruses on poultry farms and among migrating birds in Europe and  
48 other parts of the world [10]. Although human-to-human transmission of these viruses has been  
49 limited so far, experimental work indicates that only a few mutations are required to enhance  
50 transmission among humans, highlighting their pandemic potential [11-13]. This emphasizes the  
51 ongoing threat posed by influenza viruses and the requirement for a broadly-reactive influenza  
52 vaccine that protects against all influenza subtypes.

53

54 The narrow protection of inactivated influenza virus vaccines is mainly due to the induction of strain-  
55 specific antibodies against the highly variable globular head domain of influenza virus hemagglutinin  
56 (HA) [14]. New vaccine concepts strive to provide a wider range of protection by inducing responses  
57 against more conserved protein domains [15]. One way to achieve this is by inducing T-cell  
58 responses, as they can recognize epitopes derived from conserved influenza proteins such as  
59 nucleoprotein (NP), matrix protein 1 (M1) and polymerase basic protein 1 (PB1) [16-18]. T-cells can  
60 clear infected cells and T-cell immunity is associated with improved influenza disease outcome in  
61 humans [19-23]. In addition, animal models have confirmed that T cells can protect against  
62 heterosubtypic influenza virus infections [24-30]. For these reasons, various new influenza vaccine  
63 concepts focus on inducing protective T-cell immunity [14].

64

65 In recent years, lipid nanoparticle (LNP)-encapsulated nucleoside-modified mRNA (mRNA-LNP) has  
66 shown to be a potent novel vaccine format against influenza and other infectious diseases [31, 32].  
67 The potency of the mRNA-LNP platform has been demonstrated by the rapid development and  
68 successful world-wide use of mRNA-LNP-based SARS-CoV-2 vaccines [33]. mRNA-LNP induces both T-  
69 cell and antibody responses [34-38] and is therefore an interesting platform for novel influenza  
70 vaccines. Additionally, mRNA-LNP vaccines can be rapidly produced and are easily adjusted to new  
71 emerging viral variants [39]. Multiple influenza vaccines based on mRNA-LNP are currently in  
72 development, with promising early results [40-43]. These vaccines, however, primarily focus on  
73 inducing humoral responses against HA, without utilizing the potential of T-cell immunity against  
74 conserved internal influenza proteins.

75 There is still very limited information about the potential of mRNA-LNP vaccines for inducing  
76 broadly-protective T-cell responses against influenza virus infections. We set out to remedy this  
77 knowledge-gap by evaluating the immunogenicity and protective efficacy of a novel mRNA-LNP  
78 influenza vaccine in a highly relevant ferret model. We have previously shown in ferrets that  
79 circulating and respiratory T cells recognize conserved influenza virus epitopes and can protect  
80 against heterosubtypic influenza virus infection [25]. Here, we investigated if we could induce and  
81 enhance this protective immunity by vaccination with nucleoside-modified mRNA-LNP encoding for  
82 three conserved internal proteins of H1N1 influenza virus, NP, M1 and PB1 (mRNA-Flu). To mimic the  
83 human situation – which consists of both naïve young children and influenza-experienced individuals  
84 – we evaluated mRNA-Flu as a prime-boost regimen in naïve ferrets (a model for naïve children) and

85 as a booster in influenza-experienced ferrets (a model for influenza-experienced individuals). Both  
86 strategies successfully induced and boosted systemic and respiratory T-cell responses, but mRNA-Flu  
87 vaccination in influenza-experienced ferrets resulted in higher and broader responses. Moreover,  
88 mRNA-Flu booster immunization reduced disease severity in influenza-experienced ferrets after  
89 challenge with a potential pandemic avian H7N9 influenza virus, whereas mock-boosted influenza-  
90 experienced ferrets were not protected. Our results demonstrate that broadly-reactive T-cell  
91 immunity is boosted by a nucleoside-modified mRNA-LNP vaccine that encodes several internal  
92 influenza virus proteins. This mRNA-LNP vaccine enhanced protection against heterosubtypic  
93 influenza infection and is a promising strategy for the development of a universal influenza vaccine.

## 94 Results

95

### 96 *Study set-up*

97 We designed the mRNA vaccine based on the NP, M1, and PB1 proteins of H1N1 influenza virus  
98 (mRNA-Flu) since these proteins are highly conserved (Supplemental Table 1) and immunogenic in  
99 humans [25, 44]. To model mRNA-Flu vaccination in both naïve and influenza-experienced humans,  
100 we followed a prime-boost strategy with different regimens (Fig. 1a). Naïve ferrets were prime-  
101 boosted by intramuscular (i.m.) mRNA-Flu vaccination on days 0 and 42, modelling naïve individuals  
102 (group mRNA/mRNA). Another group of ferrets was primed on day 0 by intranasal (i.n.) infection  
103 with  $10^6$  TCID<sub>50</sub> A/California/07/2009 (H1N1) influenza virus followed by booster vaccination with  
104 mRNA-Flu on day 42 to mimic vaccination of influenza virus-experienced individuals (group  
105 H1N1/mRNA). As a control for this treatment, another group of ferrets received the same priming  
106 (H1N1 infection), but a mock booster with mRNA-LNP encoding for firefly luciferase (group  
107 H1N1/mock) on day 42. A placebo group that received only phosphate-buffered saline (PBS) as a  
108 prime-boost served as a negative control. The positive control consisted of ferrets that were primed  
109 by H1N1 infection and boosted with  $10^6$  TCID<sub>50</sub> A/Uruguay/217/2007 (H3N2) influenza virus, as a  
110 secondary heterosubtypic influenza infection is a very potent booster of T-cell responses (group  
111 H1N1/H3N2) [25]. Blood was collected at 0, 14, 42, 56 and 70 days post priming (dpp). Four weeks  
112 after the booster (70 dpp), ferrets were euthanized to study systemic and local T-cell responses.  
113

### 114 *An mRNA-based T-cell vaccine induces and boosts systemic cellular responses against conserved 115 influenza virus proteins*

116 We evaluated the cellular responses induced by mRNA-Flu vaccination by stimulation of peripheral  
117 blood mononuclear cells (PBMCs) from immunized ferrets with overlapping peptide pools of H1N1  
118 NP, M1 and PB1 in IFN $\gamma$  ELISpot assays. A single dose of mRNA-Flu induced cellular responses against  
119 NP, but not to M1 and PB1 at 14 dpp (Fig. 1b and Supplemental Fig. 1a). Responses were stronger  
120 and broader in H1N1 influenza virus-primed ferrets as they displayed responses against NP, M1 and  
121 PB1. The cellular response against NP in mRNA-primed ferrets increased further between 14 and 42  
122 dpp, while this response was already contracting in H1N1-primed ferrets. This might be due to the  
123 long availability of influenza antigens produced from the mRNA-LNP vaccines after i.m. immunization  
124 [45].  
125

126 mRNA-Flu vaccination at 42 dpp boosted existing cellular responses, irrespective of whether ferrets  
127 were initially primed with mRNA-Flu or H1N1 influenza (Fig. 1b). At 56 and 70 dpp, NP-specific  
128 responses were similar between mRNA/mRNA and H1N1/mRNA ferrets. Responses against M1 and  
129 PB1 were still weaker in the mRNA/mRNA group, although they were clearly boosted as  
130 approximately half of the animals developed cellular responses after the second vaccination (Fig. 1b  
131 and Supplemental Fig. 1b). Importantly, NP-specific cellular responses in mRNA/mRNA and  
132 H1N1/mRNA ferrets were similarly robust to that measured in H1N1-experienced ferrets boosted  
133 with H3N2 influenza virus infection. This finding indicates that nucleoside-modified mRNA-LNP  
134 vaccination can be as effective in boosting existing T-cell responses as a heterosubtypic influenza  
135 infection.  
136

137 Based on the high level of protein conservation of internal influenza virus proteins (>90%;  
138 Supplemental Table 1), T cells induced by mRNA-Flu or H1N1-priming should respond against a wide  
139 range of influenza viruses. Indeed, cellular responses measured in PBMCs after stimulation with  
140 H1N1 peptide pools correlated strongly with responses obtained with peptide pools specific for  
141 H2N2 influenza virus (A/Leningrad/134/17/57; Supplemental Fig. 1c). Live virus stimulations  
142 confirmed these findings as we observed substantial responses against heterosubtypic influenza  
143 viruses H3N2, H5N1 (A/Vietnam/1204/2004) and H7N9 (A/Anhui/1/2013) (Fig. 1c and Supplemental  
144 Fig. 1d). In conclusion, immunization with mRNA-Flu induces and boosts a cellular response that is

145 cross-reactive with a wide range of influenza viruses due to targeting conserved influenza virus  
146 epitopes.

147

148 *The mRNA-based T-cell vaccine induces and boosts cellular responses in the respiratory tract and*  
149 *bone marrow*

150 T cells located in the respiratory tract are essential for protection against heterosubtypic influenza  
151 virus infections [28, 46]. To determine if mRNA-Flu vaccination is also able to induce and boost T-cell  
152 responses in the respiratory tract, we assessed cellular immune responses in the bronchoalveolar  
153 lavage (BAL) fluid and nasal turbinates (NT) of immunized ferrets by IFN $\gamma$  ELISpot at 70 dpp. Despite  
154 i.m. administration, mRNA-Flu induced robust cellular responses against NP in the NT, but not in the  
155 BAL fluid of mRNA/mRNA ferrets (Fig. 2a, supplemental Fig. 1d). The effect of mRNA-Flu vaccination  
156 was even more potent in H1N1-primed ferrets. Vaccination effectively increased NP-, M1- and PB1-  
157 specific T-cell responses in the NT of H1N1/mRNA ferrets relative to H1N1/mock and mRNA/mRNA  
158 ferrets. NP-responses in the BAL fluid of H1N1/mRNA ferrets also demonstrated an increase  
159 compared to H1N1/mock ferrets. Responses against homologous (H1N1) and heterosubtypic (H3N2,  
160 H5N1, H7N9) influenza viruses were also higher in the NT (significant) and BAL (trend) of  
161 H1N1/mRNA ferrets compared to mRNA/mRNA and H1N1/mock ferrets. All groups that were  
162 initially primed intranasally with H1N1 influenza virus displayed stronger cellular responses in the NT  
163 than the mRNA/mRNA group, irrespective of whether they received a booster, suggesting that the  
164 site of priming dictates the response.

165

166 To determine whether mRNA-Flu vaccination also increased absolute T-cell numbers in the  
167 respiratory tract, we measured cell counts in the NT and BAL by flow cytometry. Compared to  
168 placebo ferrets, T-cell counts (CD3 $^+$ ) in the NT were only significantly increased in H1N1/mRNA and  
169 H1N1/H3N2 ferrets (Fig. 2b, c and Supplemental Fig. 2a, b). This was primarily due to an increase in  
170 CD8 $^+$  T cells, since CD4 $^+$  T-cell counts did not significantly differ from placebo animals. In BAL,  
171 mRNA/mRNA treatment enhanced both CD3 $^+$  and CD8 $^+$  T-cell counts compared to placebo ferrets.  
172 The effect of prime-boost with mRNA-Flu vaccination on T cell numbers in the BAL was less effective  
173 compared to a single influenza virus infection, as H1N1/mock-treated ferrets displayed higher CD3 $^+$   
174 numbers compared to mRNA/mRNA ferrets. To determine if the increased T-cell counts correlated  
175 with increased IFN $\gamma$ -responses, we performed a correlation analysis between population counts and  
176 IFN $\gamma$ -ELISpot counts induced by H1N1 peptide pool stimulation. CD8 $^+$  T cell counts showed the  
177 strongest correlation with IFN $\gamma$ -ELISpot responses, indicating that the IFN $\gamma$ -response in the BAL and  
178 NT was mainly mediated by CD8 $^+$  T cells (Supplemental Fig. 3a, b).

179

180 We additionally investigated cellular responses by IFN $\gamma$  ELISpot in lungs that were perfused with a  
181 saline solution to reduce contamination of lung-derived lymphocytes with circulating lymphocytes.  
182 Remarkably, we observed robust cellular responses against NP, but not to M1 and PB1 in the lungs  
183 of mRNA/mRNA ferrets (Fig. 2d). Responses in the lung of mRNA/mRNA ferrets exceeded those  
184 measured in the blood, indicating that it is unlikely that the increase is due to contamination with  
185 circulating lymphocytes. In H1N1-primed ferrets, mRNA-Flu vaccination significantly boosted cellular  
186 responses against NP and M1 in the lung (group H1N1/mRNA vs H1N1/mock), to levels similar as  
187 achieved by a secondary natural infection with influenza virus (group H1N1/H3N2). Cellular  
188 responses against heterosubtypic virus stimulations (H3N2, H7N9, H5N1) were however similar  
189 between the H1N1/mRNA and mRNA/mRNA groups, indicating that mRNA/mRNA ferrets were not  
190 severely hampered by low responses against M1 and PB1 (Fig. 2d and Supplemental Fig. 1d).

191

192 Next, we investigated the presence of T-cell responses in the bone marrow (BM) since it is a  
193 reservoir for memory T cells [47]. mRNA/mRNA-treatment induced strong T-cell responses against  
194 NP in the BM (Fig. 2e and Supplemental Fig. 1d). Responses were similarly robust in H1N1/mRNA  
195 ferrets, while they were modest in H1N1/mock and H1N1/H3N2 ferrets. M1 and PB1 peptide pool

196 responses were low for all groups in the BM, even though these responses were present in other  
197 tissues (Supplemental Fig. 4). The response to homologous (H1N1) and heterosubtypic (H3N2 [not  
198 significant for mRNA/mRNA], H5N1, H7N9) viruses was increased in both the mRNA/mRNA and  
199 H1N1/mRNA groups compared to H1N1/mock ferrets (Fig. 2e and Supplemental Fig. 1d). Together,  
200 these findings clearly demonstrate that the nucleoside-modified mRNA-LNP influenza T-cell vaccine  
201 is able to boost influenza virus-specific T-cell responses in the blood, respiratory tract and BM.  
202 Overall, compared to mRNA/mRNA ferrets, cellular responses were broader in H1N1/mRNA ferrets  
203 since they displayed robust M1 and PB1 responses in addition to NP (Supplemental Fig. 4).

204

205 *The mRNA-based T-cell vaccine induces and boosts both CD4<sup>+</sup> and CD8<sup>+</sup> T-cell responses in PBMC,*  
206 *spleen, lung and bone marrow.*

207 To study the T-cell response in more detail, we measured IFN $\gamma$  production of CD4<sup>+</sup> and CD8<sup>+</sup> T cells at  
208 70 dpp by flow cytometric analysis. We stimulated lymphocytes derived from blood, spleen, lung  
209 and BM with an H1N1 peptide cocktail consisting of NP, M1 and PB1 peptide pools. mRNA/mRNA  
210 and H1N1/mRNA ferrets possessed significantly more CD8<sup>+</sup>IFN $\gamma$ <sup>+</sup> T cells in all tissues investigated  
211 relative to the placebo and H1N1/mock animals (Fig. 3a, b and Supplemental Fig. 5a, b). In PBMC and  
212 lung, H1N1/mRNA ferrets demonstrated significantly stronger CD8<sup>+</sup> T-cell responses compared to  
213 mRNA/mRNA ferrets. Interestingly, the opposite was observed in the BM where mRNA/mRNA  
214 ferrets showed the most robust IFN $\gamma$ -response, although this was not significantly stronger  
215 compared to H1N1/mRNA ferrets. Importantly, the H1N1 peptide cocktail-induced IFN $\gamma$ -responses in  
216 PBMC, spleen and BM of H1N1/mRNA ferrets even exceeded those measured in ferrets boosted by a  
217 secondary infection (H1N1/H3N2 ferrets), further demonstrating the potency of the mRNA-Flu  
218 vaccine. In comparison to CD8<sup>+</sup> T cells, CD4<sup>+</sup> T-cell responses were weaker in most cases and  
219 differences between groups were slightly smaller (Fig. 3a, c and Supplemental Fig. 5a, c). Still, mRNA-  
220 Flu vaccination induced CD4<sup>+</sup> T-cell responses in all investigated compartments of mRNA/mRNA  
221 ferrets and significantly boosted CD4<sup>+</sup> T-cell responses in the blood and BM of H1N1/mRNA ferrets  
222 compared to H1N1/mock ferrets.

223

224 Stimulations with live H1N1 or H3N2 influenza virus yielded similar results to H1N1 peptide cocktail  
225 stimulations. However, there was a trend that CD8<sup>+</sup> T-cell responses in PBMC and lungs of  
226 H1N1/H3N2 ferrets were slightly stronger than in H1N1/mRNA ferrets (Fig. 3d). This is in part due to  
227 T cells that recognize conserved epitopes in proteins other than NP, M1 and PB1. CD4<sup>+</sup> T-cell  
228 responses after virus stimulation were comparable to their CD8<sup>+</sup> T cell counterparts, although CD4<sup>+</sup>  
229 T-cell responses in the lung could not be interpreted because of high IFN $\gamma$  background-responses in  
230 placebo animals (Supplemental Fig. 5d). Stimulations with H3N2 virus resulted in weaker CD4<sup>+</sup> and  
231 CD8<sup>+</sup> T cell responses compared to H1N1 virus stimulations (Fig. 3d and Supplemental Fig. 5d), which  
232 was not observed in the ELISpot assays (Fig. 2). This is likely due to a lower virus-to-cells ratio used  
233 for H3N2 stimulation in flow cytometry assays.

234

235 To investigate if mRNA-Flu vaccination leads to skewing of the T-cell response towards a CD4<sup>+</sup> or  
236 CD8<sup>+</sup> T-cell phenotype, we calculated the CD8<sup>+</sup>/CD4<sup>+</sup>-ratio within the CD3<sup>+</sup>IFN $\gamma$ <sup>+</sup> population after  
237 H1N1 peptide cocktail or H1N1 virus stimulation. In the tissues investigated, H1N1/mock and  
238 H1N1/H3N2 ferrets tended to have an average ratio of 1, demonstrating that IFN $\gamma$  responses were  
239 approximately evenly distributed between CD4<sup>+</sup> and CD8<sup>+</sup> T cells (Fig. 3e and Supplemental Fig. 5e).  
240 Interestingly, in all tissues there was a clear skewing towards a CD8<sup>+</sup> T-cell response in groups that  
241 received mRNA-Flu vaccination. Given the robust CD4<sup>+</sup> T-cell responses in mRNA-Flu-immunized  
242 ferrets, skewing towards a CD8<sup>+</sup> T cell response is not caused by a low CD4<sup>+</sup> T-cell response, but by a  
243 very strong boosting of the CD8<sup>+</sup> T-cell response. mRNA-Flu is thus a potent booster of both CD4<sup>+</sup>  
244 and CD8<sup>+</sup> T-cell immunity.

245

246 *H7N9 disease is reduced in influenza-experienced ferrets after booster vaccination*



247 Next, we investigated whether mRNA-Flu vaccination could protect against severe disease caused by  
248 a heterosubtypic avian influenza virus infection. To this end, we immunized ferrets as described  
249 above with the exception of H1N1/H3N2 ferrets and challenged these animals intratracheally (i.t.)  
250 with a lethal dose of  $10^6$  TCID<sub>50</sub> H7N9 influenza virus four weeks after the booster vaccination (Fig.  
251 4a). At this time, the boosted T-cell response is expected to be in its memory phase, similar to when  
252 (vaccinated) individuals are infected with influenza virus. Ferrets were euthanized five days post  
253 infection (dpi) to study viral replication and pathology.

254  
255 Importantly, mRNA-Flu vaccination enhanced protection against H7N9 disease in H1N1-primed  
256 ferrets. Weight loss of H1N1/mRNA ferrets was limited to 7% and stabilized 5 dpi, while placebo  
257 animals lost more than 17% of bodyweight on average and were still losing weight at 5 dpi (Fig. 4b).  
258 mRNA/mRNA ferrets showed mixed results, with weight loss in isolator 1 being similar to placebo  
259 (~15%) but less severe in isolator 2 (~11%). Of note, one (out of six) placebo ferrets and three (out of  
260 six) mRNA/mRNA ferrets displayed inactivity and severe impaired breathing at 4 dpi and needed to  
261 be euthanized due to reaching the human end-points. The mRNA/mRNA group was clearly affected  
262 by a cage-effect of unknown origin as all ferrets that reached the humane endpoints were housed in  
263 one of the two isolators. The cage effect could not be explained by pre-existing immunity or  
264 infection history with other viruses (e.g. influenza virus, Aleutian disease, ferret corona viruses), as  
265 these were similar between groups (Supplemental Table 2). The two mRNA/mRNA groups are  
266 therefore analyzed together but visualized separately. No cage-effect was present in other  
267 treatment groups.

268  
269 Weight data were in line with clinical symptoms as H1N1/mRNA-treated ferrets had less difficulty  
270 with breathing and were more active compared to other groups at 4 and 5 dpi (Fig. 4c). The height  
271 and duration of fever was not influenced by prior treatment as all groups displayed similar increases  
272 in body temperature (Fig. 4d, Supplemental Fig. 6a). Three animals in the mRNA/mRNA group  
273 showed hypothermia starting from 2 dpi and were euthanized at 4 dpi. Viral titers in nose and throat  
274 swabs were similar between groups at 2 and 3 dpi (Fig. 4e). By 5 dpi however, viral titers were lower  
275 in both H1N1/mRNA and H1N1/mock ferrets when compared to placebo. mRNA/mRNA ferrets gave  
276 mixed results. While viral titers in the nose were similar to placebo at all time-points investigated,  
277 viral titers in the throat at 5 dpi were significantly lower in surviving mRNA/mRNA ferrets compared  
278 to all other groups. We additionally measured viral titers in lung tissue. Differences were small, but  
279 H1N1/mRNA ferrets displayed significantly lower viral titers compared to all other groups (Fig. 4f).  
280 Viral titers in the trachea were low for all groups, except for the placebo group, indicating that all  
281 strategies limited viral replication to some extent.

282  
283 Despite the reduced disease severity in H1N1/mRNA ferrets, the lungs showed moderate to severe  
284 broncho-interstitial pneumonia, often related to the bronchioles and bronchi which extended to the  
285 alveoli, irrespective of treatment (Fig. 4g, Supplemental Fig. 6b). However, alveolar edema,  
286 hyperplasia of Type II pneumocytes and alveolar damage was somewhat reduced in H1N1/mRNA-  
287 vaccinated ferrets. When we measured lung weight at 5 dpi as an independent measurement of lung  
288 pathology, H1N1/mRNA ferrets had significantly lower lung-weights (Fig. 4h). This indicates that  
289 inflammation and the resulting edema was less severe, which is in line with the less impaired  
290 breathing we observed in H1N1/mRNA ferrets. From these results, we conclude that nucleoside-  
291 modified mRNA-LNP influenza booster vaccination in H1N1-experienced ferrets was able to reduce  
292 H7N9 disease severity and virus replication.

293  
294 *Protection against H7N9 influenza virus is likely mediated by cellular responses*

295 To assess whether enhanced cellular responses during H7N9 influenza virus infection are related to  
296 the observed disease outcomes, we collected PBMCs at 4 or 5 dpi (depending on when ferrets were  
297 euthanized) and stimulated cells with H1N1 peptide pools in an IFN $\gamma$  ELISpot assay. Although cellular

298 responses against M1 and PB1 were low before infection (Figure 1b), they became more substantial  
299 after infection (Supplemental Fig. 7), suggesting that M1- and PB1-specific T cells may play a role in  
300 the observed reduction in H7N9 disease parameters. Differences between groups were difficult to  
301 quantify due to the strong responses observed, which reached the upper limit of detection of the  
302 IFN $\gamma$  ELISpot assay.

303  
304 To exclude the possibility that antibodies against H7N9 influenza virus played a role in the protection  
305 against H7N9 infection we measured the level of antibodies in ferret sera before H7N9 infection (70  
306 dpp). We did not detect H7N9-specific antibodies by hemagglutination inhibition (HI) and virus  
307 neutralization (VN) assays (Fig. 5a, b). We additionally measured antibodies against H7N9 HA (H7),  
308 NP and M1 proteins by ELISA as not all influenza virus-specific antibodies can be detected by HI and  
309 VN assays. We did not find significant responses against H7, but we measured high antibody titers  
310 against NP and M1 (Fig. 5c). We could not investigate PB1-specific antibodies as the recombinant  
311 H7N9 PB1 protein was not commercially available. These findings indicate that HA-specific  
312 antibodies did not play a role in the disease reduction we observed, but the role of NP-, M1- and  
313 possibly PB1-specific antibodies remains to be investigated.



## 314 Discussion

315

316 The COVID-19 pandemic has shown the enormous potential of the nucleoside-modified mRNA-LNP  
317 vaccine platform for inducing protective immune responses against SARS-CoV-2 infection in humans.  
318 This success is driving the development of mRNA-LNP vaccines against other infectious diseases,  
319 with influenza virus as a prime example. In fact, there are currently multiple mRNA-based influenza  
320 vaccines in the clinical phase of development [48]. Most of these vaccines are primarily focused on  
321 inducing neutralizing antibodies against the globular head domain of HA, which does not solve the  
322 problem of strain-specific immunity mediated by such antibodies. T cells could target a wider range  
323 of influenza viruses, but not much is known about the potential of mRNA-LNP vaccines to induce  
324 protective influenza-specific T-cell immunity. Here, we utilized a unique ferret model in which we  
325 could measure systemic and respiratory T-cell responses to evaluate the protective capacity of a  
326 nucleoside-modified mRNA-LNP vaccine encoding three conserved influenza proteins (mRNA-Flu). To  
327 our knowledge, this is the first study that provides a detailed evaluation of an mRNA-based influenza  
328 vaccine in a relevant animal model of influenza virus infection.

329

330 To mimic the human situation, we tested a combined nucleoside-modified mRNA-LNP vaccine  
331 (mRNA-Flu) encoding the internal influenza proteins NP, M1 and PB1 as a prime-boost strategy in  
332 naïve ferrets or as a booster in influenza-experienced ferrets. Prime-boost vaccination with mRNA-  
333 Flu resulted in robust, broadly-reactive cellular responses in blood, spleen, lung, NT and BM,  
334 although responses were primarily targeted against NP. mRNA-Flu was even more effective as a  
335 booster vaccination in influenza-experienced ferrets as it enhanced T-cell responses in all tissues  
336 investigated – including the BAL – and also boosted responses against M1 and PB1. To test the  
337 protective effect of the induced immune response, we challenged ferrets with avian H7N9 influenza  
338 virus as this strain has repeatedly transmitted from birds to humans and is considered as potentially  
339 pandemic [49]. After challenge, influenza-experienced ferrets that were boosted with mRNA-Flu lost  
340 less weight, showed fewer clinical symptoms and their lungs contained less edema compared to  
341 ferrets that did not receive an mRNA-Flu booster vaccination. We did not observe a similar  
342 protection for ferrets prime-boosted with mRNA-Flu only, which might be due to less robust and  
343 broad T-cell responses in the respiratory tract. Still, these results show that our nucleoside-modified  
344 mRNA-LNP T-cell vaccine is a promising candidate to boost broadly-reactive cellular responses and  
345 can be used to enhance protection against heterosubtypic influenza viruses.

346

347 To induce a broadly-reactive T-cell response, we developed a vaccine targeting three immunogenic  
348 conserved influenza proteins. We have previously shown that both ferrets and healthy human blood  
349 donors possess clearly detectable NP-, M1- and PB1-reactive T-cells [25]. In our current experimental  
350 model, both a single mRNA-Flu vaccination and H1N1 influenza virus infection elicited NP-specific  
351 responses. Responses against M1 and PB1 were weaker, especially in mRNA-Flu-primed animals.  
352 However, booster vaccination increased M1- and PB1-specific responses in all H1N1-primed ferrets  
353 and approximately half of the mRNA/mRNA ferrets developed detectable M1 and PB1-specific  
354 responses. Although it is unclear why M1- and PB1-responses were weak initially, these responses  
355 substantially increased shortly after H7N9 influenza virus challenge, suggesting that M1- and PB1-  
356 specific T cells played a role in reducing H7N9 influenza disease. This indicates that it could be  
357 beneficial if future mRNA-based influenza vaccines targeted multiple relatively well-conserved  
358 internal proteins. This would also safeguard against influenza virus mutations as the virus is less  
359 likely to escape from a broad immune response.

360

361 The T cells induced by mRNA-Flu vaccination responded to a wide range of influenza viruses,  
362 including seasonal H3N2, pandemic H2N2 and avian H5N1 and H7N9 strains. Previous research has  
363 already shown that T cells are crucial for protection against heterosubtypic infections, especially lung  
364 resident memory T-cells (Trm) [46, 50]. We show that mRNA-LNP vaccination – in contrast to

365 inactivated influenza vaccines [51] – is able to induce T cells residing in the respiratory tract, even  
366 when given i.m. Whether these T cells possess a Trm phenotype still remains to be elucidated due to  
367 a lack of ferret-specific reagents. The T-cell responses we found in NT and lung after mRNA-Flu  
368 prime-boost confirms a previous report of Lackzo et al. who found that i.m. administration of mRNA-  
369 LNP vaccines induced potent cellular responses in the lungs of mice [52]. The responses we found  
370 were not an artefact of circulating lymphocytes as lungs were perfused and cellular responses in the  
371 lung were higher than those in the blood, showing that influenza virus-specific T cells accumulated in  
372 the lung tissue. Still, responses in the BAL were absent in mRNA-Flu prime-boosted ferrets, indicating  
373 that local presentation of antigen and/or inflammation is required for extended tissue-residing  
374 cellular immunity. Intranasal administration of mRNA vaccines could potentially enhance protection  
375 by also inducing T cells in the BAL and increasing T-cell numbers in the NT, but additional research  
376 needs to be performed to overcome the epithelial barrier and to prevent excessive immune  
377 activation [53]. Remarkably, mRNA-Flu vaccination boosted cellular responses in the BAL, NT and  
378 lungs of H1N1-primed ferrets that reacted not only to NP, but also to M1 and PB1. This is a  
379 particularly relevant finding as a large part of the human population has already been naturally  
380 exposed to influenza virus. For this group, a single mRNA-LNP immunization administered i.m. might  
381 be sufficient to boost respiratory T-cell responses. These findings stress the importance of animal  
382 models that reflect the human infection history as pre-existing immunity can clearly influence  
383 vaccine responses.

384  
385 mRNA-Flu also induced potent responses in the BM. This might be partly caused by the close  
386 proximity of mRNA-Flu administration (hind legs) and T-cell isolation from the BM (femur). In fact, T  
387 cells can be primed in the BM after local antigen presentation [54, 55]. This can be beneficial for the  
388 longevity of the cellular response as the BM serves as a reservoir for memory T cells [56, 57]. The  
389 observation that nucleoside-modified mRNA-LNP vaccination is a potent inducer of BM-residing T-  
390 cell immunity warrants further investigations into the longevity and importance of this response.

391  
392 In our study, vaccine-induced T-cell responses consisted of both CD4<sup>+</sup> and CD8<sup>+</sup> T cells. Similarly,  
393 Freyn et al. found that a single dose of H1N1 NA- or NP-encoding mRNA-LNP induced robust CD4<sup>+</sup>  
394 and CD8<sup>+</sup> T-cell responses in mice [40]. In humans, SARS-CoV-2 mRNA-LNP vaccines also induced  
395 both CD4<sup>+</sup> and CD8<sup>+</sup> T cells, although the extent to which the vaccines induced CD4<sup>+</sup> and CD8<sup>+</sup> T cells  
396 differs between studies [34, 58, 59]. We found that the T-cell response after mRNA-Flu booster  
397 vaccination was skewed towards a CD8<sup>+</sup> phenotype. This skewing might be beneficial, as clearing off  
398 virus-infected cells is primarily mediated by CD8<sup>+</sup> T cells [20]. It should be mentioned, however, that  
399 we could only measure IFN $\gamma$  responses and we might have missed activated CD4<sup>+</sup> T cells that  
400 responded by producing other typical CD4<sup>+</sup> cytokines such as TNF- $\alpha$  and IL-2.

401 Besides T cells, the mRNA-Flu vaccine also induced humoral responses against NP, M1 and possibly  
402 PB1; antibodies against PB1 could not be measured due to the lack of reagents. We did not find any  
403 functional role for NP- and M1-antibodies by HI and VN assays, although these assays primarily  
404 detect (neutralizing) anti-HA antibodies. Still, in mice, vaccination with recombinant NP induced  
405 potent anti-NP antibodies that protected against severe disease after an influenza virus challenge,  
406 but only if these mice also possessed functional T cells [60, 61]. This protection might be mediated  
407 by antibody-dependent cell cytotoxicity (ADCC) activity, although it is still uncertain if NP- and M1-  
408 specific antibodies can facilitate ADCC [62, 63]. Whether ADCC or other effector mechanisms played  
409 a role in our study remains therefore unknown. Future serum transfer experiments in ferrets could  
410 help in clarifying the exact role of NP-, M1- and PB1-specific antibodies in the protection against  
411 influenza virus disease.

412  
413 To evaluate the robustness of T-cell-mediated protective immunity, we utilized a ferret challenge  
414 model in which a lethal dose of H7N9 influenza virus was deposited directly into the lungs of animals

415 by intratracheal inoculation. In this way, a large amount of pneumocytes become directly infected  
416 and T cells are only granted a short timeframe to become activated and prevent further disease. This  
417 robust challenge model is not representative of a normal human exposure. People typically  
418 encounter a lower viral load [64] and primarily in the upper respiratory tract, which affords T cells a  
419 longer time to establish protective immunity. We thus expect a greater protective effect of the T-cell  
420 response upon natural infection doses. The challenge model we used – while not utilizing a natural  
421 inoculation route and dose – very well represents the severe pneumonia observed in humans  
422 hospitalized with H7N9 influenza virus infection, which cannot be achieved with lower infection  
423 doses and other inoculation routes.

424

425 We could not clearly establish whether a prime-boost strategy with mRNA-Flu was protective likely  
426 due to a cage effect. Ferrets prime-boosted with mRNA-Flu housed in one isolator showed  
427 protection against H7N9 influenza disease similarly to mRNA-Flu-boosted influenza-experienced  
428 ferrets. Ferrets in the second isolator however showed more severe symptoms after infection than  
429 the placebo animals and needed to be euthanized one day prior to the scheduled termination of the  
430 experiment. We did not find differences between the two cages that explain this discrepancy. Both  
431 humoral and cellular immune responses were similar, ferrets tested negative for Aleutian disease  
432 and showed similar previous exposure to canine distemper virus and ferret corona viruses. For  
433 practical reasons, the H7N9 influenza virus challenge was performed on two consecutive days with  
434 each treatment group split over both days (see Materials & Methods for details). It is unlikely that  
435 differences are due to separate preparation of the inoculum, as all other groups – which were also  
436 divided over two days – did not respond differently to the challenge. Additional experiments would  
437 be required to clarify if the influenza-specific T-cell response induced by prime-boost vaccination  
438 with mRNA-Flu is protective in naïve ferrets.

439

440 In contrast to traditional inactivated influenza virus vaccines, nucleoside-modified mRNA-LNP  
441 vaccines can induce both humoral and cellular immunity [34-38]. With the induction of a broadly-  
442 reactive T-cell response, these vaccines should be less sensitive to antigenic drift and shift that have  
443 hampered traditional HA-based vaccines. Furthermore, mRNA-LNP SARS-CoV-2 vaccines perform  
444 remarkably well in elderly people [65, 66], while inactivated influenza virus vaccines often have  
445 subpar performance with increasing age [67]. mRNA-based influenza vaccines might thus be  
446 especially suited to protect this group that is at high risk for influenza-related mortality and  
447 morbidity. For these reasons, the nucleoside-modified mRNA-LNP platform is a viable option for the  
448 improvement of seasonal influenza vaccination. The inclusion of conserved internal influenza virus  
449 proteins could additionally provide protection against potential pandemic influenza viruses, as  
450 demonstrated in the current study. To our best knowledge, this is the first study that provides a  
451 detailed evaluation of an mRNA-based combined influenza T-cell vaccine in a highly relevant ferret  
452 model. We postulate that the nucleoside-modified mRNA-LNP-based influenza vaccine can boost the  
453 number of broadly-reactive T-cells to a level that prevents severe disease and death, reducing the  
454 impact of future influenza epidemics and pandemics on the society.

455

456

#### 457 **Acknowledgements**

458 We would like to thank Marion Hendriks, Jolanda Kool, Helena Pinheiro Guimarães, Noortje Smits,  
459 Ronald Jacobi and Martijn Vos for their help during the animal sections, the biotechnicians from the  
460 animal facility for excellent care-taking of the animals and Dr. Teun Guichelaar and Dr. Willem  
461 Luytjes for critical reviewing of the manuscript.

462

463

464

465

466 **Funding**

467 KvdV and JdJ receive funding from the Dutch ministry of health, welfare, and sports (VWS). NP is  
468 supported by the National Institutes of Health (NIH) grant R01-AI146101-01. The funders had no role  
469 in the design, conduct and interpretation of the study, the writing and review of the manuscript or  
470 the decision to submit the manuscript for publication.

471

472

473 **Author contributions**

474 Conceptualization: KvdV, DvB, NP, JdJ

475 Methodology: KvdV, JdJ

476 Software: JAF

477 Formal analysis: KvdV, JvdB

478 Investigation: KvdV, JL, HvD, CVBdM, SL, FP

479 Resources: NP, HM, MBB, PJCL

480 Data curation: KvdV

481 Writing – original draft: KvdV, JAF

482 Writing – review & editing: JL, DvB, NP, JdJ

483 Visualization: KvdV

484 Supervision: JdJ

485 Project administration: JdJ

486 Funding acquisition: JdJ, NP

487

488

489 **Conflict of interest**

490 N.P. is named on a patent describing the use of modified mRNA in lipid nanoparticles as a vaccine  
491 platform. Additionally, N.P. is named on a patent filed on universal influenza vaccines using  
492 nucleoside-modified mRNA. N.P. has disclosed those interests fully to the University of Pennsylvania,  
493 and he has in place an approved plan for managing any potential conflicts arising from licensing of  
494 these patents. M.B.B. and P.J.C.L. are employees of Acuitas Therapeutics.

## 495 **Materials & Methods**

496

### 497 *Ethics statement*

498 The experiment was approved by the Animal Welfare Body of Poonawalla Science Park – Animal  
499 Research Center (Bilthoven, The Netherlands) under permit number AVD3260020184765 of the  
500 Dutch Central Committee for Animal experiments. All procedures were conducted according to EU  
501 legislation. Ferrets were examined for general health on a daily basis. If animals showed severe  
502 disease according to the defined end points prior to scheduled termination they would be  
503 euthanized by cardiac bleeding under anesthesia with ketamine (5 mg/kg; Alfasan, Woerden, The  
504 Netherlands) and medetomidine (0.1 mg/kg; Orion Pharma, Espoo, Finland). Endpoints were scored  
505 based on clinical parameters for activity (0 = active; 1 = active when stimulated; 2 = inactive and 3 =  
506 lethargic) and impaired breathing (0 = normal; 1 = fast breathing; 2 = heavy/stomach breathing).  
507 Animals were euthanized when they reached score 3 on activity level (lethargic), when the combined  
508 score of activity and breathing impairment reached 4 or if their body weight decreased by more than  
509 20%.

510

### 511 *Cell & virus culture*

512 MDCK cells were grown in MEM (Gibco, Thermo Fisher Scientific, Waltham, MA) supplemented with  
513 10% fetal bovine serum (FBS; HyClone, GE Healthcare, Chicago, IL), 40 µg/ml gentamicin and 0.01M  
514 Tricin (both from Sigma-Aldrich, Saint Louis, MO). VERO E6 cells were cultured in DMEM (Gibco)  
515 supplemented with 10% FBS and 1x penicillin-streptomycin-glutamine (Gibco). A/California/07/2009  
516 (H1N1), A/Switzerland/97-15293/2013 (H3N2), A/Vietnam/1203/2004 WT (H5N1), A/Anhui/1/2013  
517 (H7N9) and H7N9/PR8 reassortant (NIBRG-268, NIBSC code 13/250) influenza viruses were obtained  
518 from the National Institute for Biological Standards and Control (NIBSC, Hertfordshire, England).  
519 Influenza virus was grown on MDCK cells in MEM medium supplemented with 40 µg/ml gentamicin,  
520 0.01M Tricine and 2 µg/ml TPCK treated trypsin (Sigma-Aldrich). At >90% cytopathic effect (CPE), the  
521 suspension was collected and spun down (4000x g for 10 minutes) to remove cell debris. H1N1 and  
522 H3N2 virus was sucrose purified on a discontinuous 10-50% sucrose gradient. Due to BSL-3  
523 classification of H7N9 and H5N1, the virus was not purified. All virus aliquots were snap-frozen and  
524 stored at -80 °C.

525

### 526 *mRNA production*

527 NP, M1 and PB1 mRNAs are based on the A/Michigan/45/2015 H1N1pdm virus, which is nearly  
528 identical to A/California/07/2009 (NP = 99.2%, M1 = 98.4% and PB1 = 99.6% conserved). Production  
529 of mRNAs was performed as described earlier [40, 68]. Briefly, codon-optimized NP, M1, and PB1  
530 genes were synthesized (Genscript, Piscataway, NJ) and cloned into an mRNA production plasmid.  
531 T7-driven in vitro transcription reactions (Megascript, Ambion, Thermo Fisher) using linearized  
532 plasmid templates were performed to generate mRNAs with 101 nucleotide long poly(A) tails.  
533 Capping of mRNAs was performed in concert with transcription through addition of a trinucleotide  
534 cap1 analog, CleanCap (TriLink, San Diego, CA) and m1Ψ-5'-triphosphate (TriLink) was incorporated  
535 into the reaction instead of UTP. Cellulose-based purification of mRNAs was performed as described  
536 [69]. mRNAs were then tested on an agarose gel before storing at -20 °C.

537

### 538 *Lipid nanoparticle formulation of mRNA*

539 Purified mRNAs were formulated into lipid nanoparticle using a self-assembly process wherein an  
540 ethanolic lipid mixture of an ionizable cationic lipid, phosphatidylcholine, cholesterol, and  
541 polyethylene glycol-lipid was rapidly combined with an aqueous solution containing mRNA at acidic  
542 pH as previously described [45]. The ionizable cationic lipid (pKa in the range of 6.0-6.5, proprietary  
543 to Acuitas Therapeutics, Vancouver, Canada) and LNP composition are described in the patent  
544 application WO 2017/004143. The average hydrodynamic diameter was ~80 nm with a  
545 polydispersity index of 0.02-0.06 as measured by dynamic light scattering using a Zetasizer Nano ZS



546 (Malvern Instruments Ltd, Malvern, UK) and an encapsulation efficiency of ~95% as determined  
547 using a Ribogreen assay.

548

#### 549 *Animal handling*

550 63 female ferrets (*Mustela putorius furo*) aged 12-13 months (Euroferret, Copenhagen, Denmark)  
551 were delivered three weeks before commencement of the study and were semi-randomly  
552 distributed by weight. Ferret throat swabs were screened for SARS-CoV-2 by RT-qPCR as described  
553 before [70] and ferret sera was screened for influenza exposure by NP ELISA (Innovate Diagnostics,  
554 Grabels, France) and HI. Additionally, ferret sera (ELISA) and swabs (RT-qPCR) were screened for  
555 other corona viruses, canine distemper virus and Aleutian disease by the European Veterinary  
556 Laboratory (EVL, Woerden, the Netherlands). All ferrets tested negative for influenza and SARS-CoV-  
557 2; four animals displayed low antibody titers against Aleutian disease; all animals possessed titers for  
558 CDV-antibodies but tested negative for active infection by RT-qPCR. Ferrets were housed per 3 or 4  
559 animals in open cages and received pelleted food (Altromin 5539) and water *ad libitum*. Animals  
560 were visually inspected daily and weighed at least once per 7 days. Light was adjusted to 9.5 hours  
561 per day to prevent the ferrets from going into estrous. For influenza infections animals were moved  
562 to BSL-3 level isolators. Due to a limited number of isolators, groups that did not receive an infection  
563 were kept housed in regular open cages. 14 days after infection the animals were confirmed to be  
564 negative for infectious influenza and moved back to regular housing.

565

566 Ferrets that received a (mock) infection were swabbed and weighed at 0, 2, 4, 7, 9 and 14 days after  
567 the first and second infection. Vaccinated animals were only swabbed at days 0 and 14 and weighed  
568 on days 0, 7 and 14. Blood was collected from the vena cava at 0, 14, 28, 42, 56 and 71 days post  
569 priming (dpp). These handlings were performed under anesthesia with ketamine (5 mg/kg). Blood  
570 was collected by heart puncture on 70 and 76 dpp. Infections, vaccinations, temperature  
571 transponder implantation and euthanasia were performed after anaesthetization with ketamine and  
572 medetomidine (0.1 mg/kg). Animals that received a temperature transponder (Star Oddi, Garðabær,  
573 Iceland) abdominally received 0.2 ml Buprenodale (AST Farma, Oudewater, The Netherlands) as a  
574 post-operative analgesic. Anesthesia with medetomidine was antagonized with atipamezole (0.25  
575 mg/kg; Orion Pharma), but was delayed by 30 minutes in case of infection/vaccination to prevent  
576 sneezing and coughing.

577

#### 578 *Study outline*

579 The study consisted of five experimental groups: 1) placebo; 2) mRNA/mRNA; 3) H1N1/mock; 4)  
580 H1N1/mRNA; and 5) H1N1/H3N2. Each experimental group consisted of 14 (group 1-4) or 7 (group  
581 5) ferrets. For practical reasons the experiment was split into three sub experiments (A, B and CD).  
582 All sub-experiments followed the same regime up to day 70 of the experiment, but were started 8  
583 days after each other. Sub-experiments A and B both contained groups 1-5 with 3-4 animals/group  
584 and were terminated 70 dpp to study the immune response. Sub-experiment CD contained groups 1-  
585 4 with 7 animals/group, split over 2 cages. Sub-experiment CD was again divided into two smaller sub-  
586 experiments (C and D) on 71 dpp, which were challenged with H7N9 on 71 and 72 dpp respectively.  
587 Data from the different sub-experiments were visualized and analyzed together.

588

589 On day 0, groups 3-5 were inoculated intranasally (i.n.) with  $10^6$  TCID<sub>50</sub> H1N1 in 0.1 ml inoculum.  
590 Group 1 received PBS in the same manner. Group 2 was administered 250 µl of mRNA vaccine –  
591 containing 50 µg of NP, M1 and PB1 – in their left or right hindleg. On 42 dpp, animals received a  
592 booster treatment. Group 5 was inoculated i.n. with  $10^6$  TCID<sub>50</sub> H3N2 in 0.1 ml inoculum. Group 1  
593 was treated similarly but received PBS instead of H3N2 virus. Groups 2-4 were injected with 250 µl  
594 of influenza-mRNA vaccine (groups 2, 4) or Luciferase-mRNA (group 3; 50 µg) in their left or right  
595 hindleg. At 70 dpp, seven ferrets of each group were euthanized to study the immune response in  
596 the respiratory tract. The other seven animals (excluding group 5) were challenged intratracheally



597 (i.t.) with  $10^6$  TCID<sub>50</sub> H7N9 in 3ml inoculum at 71 or 72 dpp. Five days later, ferrets were euthanized  
598 to study viral titers and pathology.

599

600 Animals were euthanized by heart puncture and blood and serum was collected. For ferrets in sub-  
601 experiments A and B, the lungs were perfused as described before [25] and broncho-alveolar lavage  
602 (BAL) was collected by flushing the lungs twice with 30ml of room temperature (RT) RPMI1640  
603 (Gibco). The BAL fluid was then kept on ice till processing. Lungs, spleen, femur (right leg) and nasal  
604 turbinates (NT) were collected in cold RPMI1640 supplemented with 10% FBS and 1x penicillin-  
605 streptomycin-glutamine and stored at +4 °C until processing. For ferrets in sub-experiments C and D,  
606 lungs were weighed before the left cranial and caudal lobes were inflated with and stored in 10%  
607 formaldehyde for later pathological analysis. Small slices of the right cranial, middle and caudal lobes  
608 were put in Lysing matrix A tubes (MP Biomedicals, Irvine, CA) and stored at -80 °C until later  
609 virological analysis. The lower part of the trachea was stored in 10% formaldehyde for pathology and  
610 1 cm of the middle part of the trachea was stored in Lysing matrix A tubes.

611

#### 612 *Tissue processing*

613 Blood was collected in 3.5 ml VACUETTE tubes with clot activator (Greiner, Merck, Kenilworth, NJ)  
614 and spun down at 4000x g for 10 minutes to isolate serum. Heparin blood was collected in 9 ml  
615 sodium-heparin coated VACUETTE tubes (Greiner) and diluted 1:1 with PBS (Gibco) for density  
616 centrifugation on a 1:1 mixture of LymphoPrep (1.077 g/ml, Stemcell, Vancouver, Canada) and  
617 Lympholyte-M (1.0875 g/ml, Cedarlane, Burlington, Canada). Cells were spun for 30 minutes at 800x  
618 g, after which the interphase was collected and washed thrice with washing medium (RPMI1640 +  
619 1% FCS + 1x penicillin-streptomycin-glutamine). Next, cells were resuspended in stimulation medium  
620 (RPMI1640 + 10% FCS + 1x penicillin-streptomycin-glutamine) and counted using a hemocytometer.

621

622 Spleen, lung and NT tissue were processed as detailed before [25]. In brief, spleens were  
623 homogenized in a sieve using the plunger of a 10 ml syringe. The resulting suspension was collected  
624 while excluding the larger debris and pelleted by centrifugation for 10 minutes at 500x g. The pellet  
625 was resuspended in 50 ml EDTA-supplemented (2mM) washing medium and transferred over a 100  
626 µm SmartStrainer (Miltenyi Biotec, Bergisch Gladbach, Germany). The cell suspension was then  
627 diluted to 90 ml, which was divided into 3x 30 ml and layered on top of 15 ml Lympholyte-M for  
628 density centrifugation similar to that of blood. All washing steps were performed with EDTA-  
629 supplemented medium to prevent agglutination of cells.

630

631 Lungs were cut into 5 mm<sup>3</sup> cubes and digested in 12 ml of collagenase I (2.4 mg/ml, Merck) and  
632 DNase I (1 mg/ml, Novus Biologicals, Centennial, CO) for 60 minutes at 37 °C while rotating. Samples  
633 were homogenized in a sieve using a plunger, spun down for 10 minutes at 500x g and resuspended  
634 in washing medium. This suspension was transferred over a 70 µm cell strainer (Greiner) and used  
635 for density centrifugation similar to that of the spleen.

636

637 Nasal turbinates were mashed on a sieve using a plunger and pelleted by spinning for 5 minutes at  
638 500x g. The pellet was resuspended in 3 ml collagenase/DNase solution (similar to lung) and  
639 incubated for 30 minutes at 37 °C while rotating. Next, the suspension was directly mashed over a 70  
640 µm cell strainer (Greiner) with a plunger and washed twice with 10 ml washing medium. The  
641 resulting pellet was resuspended in 6 ml of 40% Percoll (GE Healthcare) and layered on top of 70%  
642 Percoll to isolate leukocytes. Samples were spun for 20 minutes at 500x g after which the interphase  
643 was collected and washed twice with washing medium. After the final wash, cells were resuspended  
644 in stimulation medium and used for ELISpot and FACS.

645

646 After collection, 3 ml BAL was used for ELISpot without further processing. The remaining volume  
647 was spun down at 500x g for 5 minutes and resuspended in 12 ml FACS buffer (PBS [Gibco]+ 0.5%

648 BSA [Merck] + 2mM EDTA). The suspension was transferred over a 70 µm SmartStrainer (Miltenyi  
649 Biotec), spun down at 500x g for 5 minutes and resuspended in FACS buffer. This suspension was  
650 used for FACS.

651

652 Femurs were cleaned from residual tissues and briefly decontaminated with 70% ethanol. The femur  
653 was then cut on both sides so that the shaft could be flushed with 15 ml of ice-cold RPMI washing  
654 medium. The suspension was transferred over a 70 µm cell strainer and pelleted by centrifugation  
655 for 7 minutes at 500xg at 4 °C. Erythrocytes were lysed with ACK lysis buffer after which the  
656 suspension was spun down, resuspended in washing medium and again transferred over a 70 µm  
657 cell strainer. The resulting suspension was spun down, resuspended in stimulation medium and used  
658 for ELISpot and FACS.

659

#### 660 *Peptide pools*

661 NP (NR-18976), M1 (NR-21541) and PB1 (NR-18981) H1N1 peptide arrays were obtained through BEI  
662 Resources, NIAID, NIH. Peptides were supplied as individual aliquots and were pooled in-house after  
663 dissolving in H<sub>2</sub>O, 50% acetonitrile or DMSO depending on the solvability. The merged peptide-  
664 suspension was then aliquoted and speed-vacced for 48 hours to reduce the volume. Vials were  
665 stored at -80 °C.

666

667 H2N2 peptide pools were based on A/Leningrad/134/17/1957 and were custom ordered from JPT  
668 Peptide Technologies GmbH (Berlin, Germany). Each pool contained 15 amino acid long peptides  
669 with an overlap of 11 amino acids spanning the entire protein of NP, M1 or PB1. Peptides were  
670 synthesized as reported before [25]. HIV-1 Con B gag motif peptide pool (JPT) served as a negative  
671 control for our assays and was handled in the same way as the H2N2 peptide pools.

672

673 Before use, H1N1 and H2N2 peptide pools were dissolved in DMSO, aliquoted and stored at -20 °C.  
674 On the day of use, peptide pool aliquots were thawed and diluted with stimulation medium. The  
675 peptide pool suspension was added to cells, such that a final peptide concentration of 1 µg/ml per  
676 peptide with a DMSO concentration of less than 0.2% was achieved.

677

#### 678 *ELISpot*

679 Pre-coated Ferret IFNγ ELISpot (ALP) plates (Mabtech, Nacka Strand, Sweden) were used according  
680 to the manufacturers protocol. Lymphocytes were stimulated with live virus (MOI 100 for H3N2;  
681 MOI 1 for H5N1; MOI 0.1 for H1N1 and H7N9) or peptide pools (1 µg/ml) in ELISpot plates at 37 °C.  
682 Per well, 250K cells (PBMC), 400K cells (BM), 62.5K cells (lung lymphocytes) or undiluted cell  
683 suspension (BAL, nasal turbinates) was added. On day 56 – 2 weeks after booster vaccination – 125K  
684 PBMCs were used for viral stimulations due to high cellular responses. After 20 hours the plates  
685 were developed according to the manufacturers protocol, with the modification that the first  
686 antibody staining was performed overnight at 4 °C. Plates were left to dry for 2-3 days after which  
687 they were packaged under BSL-3 conditions and heated to 65 °C for 3 hours to inactivate any  
688 remaining infectious influenza particles. Analysis of ELISpot plates was performed using the  
689 ImmunoSpot® S6 CORE (CTL, Cleveland, OH).

690

#### 691 *Flow cytometry – cell counts*

692 BAL and NT samples were stained in 96-wells plates using the FoxP3 / Transcription factor staining  
693 buffer set (eBioscience, Thermo Fisher). Cells were stained with α-CD4-APC (O2, Sino biological,  
694 Beijing, China), α-CD8a-eFluor450 (OKT8, eBioscience), α-CD14-PE (Tük4; Thermo Fisher) and Fixable  
695 Viability Stain 780 (BD, Franklin Lakes, NJ) in 100 µl for 30 minutes at 4°C. Samples were then  
696 washed twice with 150 µl FACS buffer, followed by fixation with 100 µl fixative from the FoxP3  
697 staining kit for 20 minutes at RT. Next, samples were washed twice with 150 µl 1x permeabilization  
698 buffer (FoxP3 staining kit). After the second wash, samples were stained with 100 µl

699 permeabilization buffer containing  $\alpha$ -CD3e-FITC (CD3-12, Bio-Rad, Hercules, CA) for 30 minutes at 4  
700 °C. Samples were then washed twice with 150  $\mu$ l 1x permeabilization buffer and once with 150  $\mu$ l  
701 FACS buffer. After the last wash, samples were resuspended in 180  $\mu$ l FACS buffer after which 50  $\mu$ l  
702 precision count beads (Biolegend, San Diego, CA) were added to BAL and NT samples. Samples were  
703 measured in plates using the high-throughput system of a Symphony A3 system (BD). Data was  
704 analyzed using FlowJo™ Software V10.6 (BD).

705

#### 706 *Flow cytometry – intracellular cytokine staining*

707 Lymphocytes derived from blood, lung or BM were stimulated in U-bottom plates with 1-3 million  
708 cells/well. Stimulations consisted of medium, H1N1 live virus (MOI 1), H3N2 live virus (MOI 10), an  
709 H1N1 peptide cocktail containing peptide pools of NP, M1 and PB1 (1  $\mu$ g/peptide/ml), and a HIV  
710 peptide pool (1  $\mu$ g/peptide/ml) serving as a negative control. Cells were stimulated for 20 (virus,  
711 medium) or 6 hours (peptide pools) at 37 °C. During the last 5 hours of stimulation, 1x brefeldin A  
712 (Biolegend) was added to each well. Plates were then stored at 4 °C until they were stained the  
713 following morning. Staining and acquisition followed the same procedure as detailed above, with the  
714 exception that  $\alpha$ -CD14-PE was absent in the extracellular staining and instead,  $\alpha$ -IFN $\gamma$ -RPE (CC302,  
715 MyBioSource, San Diego, CA) was added to the intracellular staining.

716

#### 717 *TCID<sub>50</sub> determination*

718 Nose and throat swabs were collected in 2 ml transport medium containing 15% sucrose (Merck),  
719 2.5  $\mu$ g/ml Amphotericin B, 100 U/ml penicillin, 100  $\mu$ g/ml streptomycin and 250  $\mu$ g/ml gentamicin  
720 (all from Sigma) and stored at -80 °C. For analysis, swabs were thawed, vortexed, serially diluted and  
721 tested in sextuplicate on MDCK cells. Trachea and lung samples stored in Matrix A tubes were  
722 thawed and 750  $\mu$ l of DMEM infection medium (DMEM containing 2% FBS and 1x penicillin-  
723 streptomycin-glutamine) was added. Tissues were then dissociated in a FastPrep-24™ by shaking  
724 twice for 1 minute after which the samples were spun down for 5 minutes at 4000x g. To determine  
725 viral titers, the supernatant was serially diluted in sextuplicate on MDCK cells. Cytopathic effect  
726 (CPE) was scored after 6 days of culturing and TCID<sub>50</sub> values were calculated using the Reed &  
727 Muench method. Viral titers in virus stocks were similarly tested, but in octuplicate.

728

#### 729 *ELISA*

730 Immulon 2 HB 96-well plates (Thermo Fisher) were coated overnight at RT with 100  $\mu$ l/well  
731 recombinant HA (0.5  $\mu$ g/ml), NP (0.5  $\mu$ g/ml) or M1 (0.25  $\mu$ g/ml) protein of A/Anhui/1/2013 (Sino  
732 biologicals). The next day, plates were washed thrice with PBS + 0.1% Tween-80 before use. Sera  
733 were diluted 1:100 in PBS + 0.1% Tween-80 and then 2-fold serially diluted. Per well, 100  $\mu$ l of  
734 diluted sera was added and plates were incubated for 60 minutes at 37 °C. After washing thrice with  
735 0.1% Tween-80, plates were incubated for 60 minutes at 37 °C with HRP-conjugated goat anti-ferret  
736 IgG (Alpha Diagnostic), diluted 1:5000 in PBS containing 0.1% Tween-80 and 0.5% Protivar (Nutricia,  
737 Hoofddorp, The Netherlands). Plates were then washed thrice with PBS + 0.1% Tween-80 and once  
738 with PBS, followed by development with 100  $\mu$ l SureBlue™ TMB (KPL, Gaithersburg, MD) substrate.  
739 Development was stopped after 10 minutes by addition of 100  $\mu$ l 2M H<sub>2</sub>SO<sub>4</sub> and OD<sub>450</sub>-values were  
740 determined on the EL808 absorbance reader (Bio-Tek Instruments). Individual curves were visualized  
741 using local polynomial regression fitting with R software v4.1.1 [71]. Antibody titers were  
742 determined as the dilution at which antibody responses dropped below background. This  
743 background was calculated as the 'mean + 3 \* standard deviation' of the OD<sub>450</sub> at a 200x (HA, M1) or  
744 1600x (NP) serum-dilution of placebo animals.

745

#### 746 *Hemagglutination inhibition assay*

747 Hemagglutination inhibition (HI) titers in ferret sera were determined in duplicate according to WHO  
748 guidelines [72]. In brief, sera were heat-inactivated at 56 °C for 30 minutes and treated with  
749 receptor destroying enzyme (Sigma) in a 1:4 mixture (5x dilution of sera). Sera were then two-fold

750 serially diluted in PBS with and mixed 1:1 with four hemagglutinating units of H1N1 or H7N9 in 96  
751 wells plates (starting dilution = 1:10). The serum-virus mixture was incubated for 20 minutes at RT,  
752 followed by the addition of 0.5% turkey red blood cells (bioTRADING) in a 1:1 mixture. Samples were  
753 incubated for 45 minutes at RT after which agglutination was scored.

754

#### 755 *Virus neutralization assay*

756 Virus neutralizing (VN) titers were determined as described previously [73] and according to WHO  
757 guidelines [72]. Sera were inactivated (30 minutes at 56 °C) and two-fold serially diluted in virus  
758 growth medium using a starting dilution of 1:8. Virus at a concentration of 100 TCID<sub>50</sub> was added and  
759 the mixture was incubated for 2 hours at 37 °C. Next, the virus-serum mixture was transferred to 96  
760 wells plates containing confluent MDCK cells and incubated for another 2 hours at 37 °C after which  
761 the medium was refreshed. Plates were incubated until a back titration plate reached CPE at a titer  
762 of 100 TCID<sub>50</sub> (4-5 days). The 50% virus neutralization titers per ml serum was calculated by the Reed  
763 and Muench method [74].

764

#### 765 *Pathology*

766 Tissues harvested for histological examination (trachea, bronchus and left lung) were fixed in 10%  
767 neutral-buffered formalin, embedded in paraffin, sectioned at 4 µm and stained with hematoxylin  
768 and eosin (HE) for examination by light microscopy. Semiquantitative assessment of influenza virus-  
769 associated inflammation in the lung (four slides with longitudinal section or cross-section of cranial  
770 or caudal lobes per animal) was performed on every slide as reported earlier [75] with few  
771 modifications: for the extent of alveolitis and alveolar damage we used: 0, 0%; 1, 1–25%; 2, 25–50%;  
772 3, >50%. For the severity of alveolitis, bronchiolitis, bronchitis, and tracheitis we scored: 0, no  
773 inflammatory cells; 1, few inflammatory cells; 2, moderate numbers of inflammatory cells; 3, many  
774 inflammatory cells. For the presence of alveolar edema and type II pneumocyte hyperplasia we  
775 scored: 0, 0%, 1, <25%, 2, 25-50%, 3, >50%. The presence of alveolar hemorrhage we scored: 0, no;  
776 1, yes. For the extent of peribronchial/perivascular edema we scored: 0, no, 1, yes. Finally, for the  
777 extent of peribronchial, peribronchiolar, and perivascular infiltrates we scored: 0, none; 1, one to  
778 two cells thick; 2, three to ten cells thick; 3, more than ten cells thick. Slides were examined without  
779 knowledge of the treatment allocation of the animals.

780

#### 781 *Body temperature, body weight and lung weight*

782 Temperature data were retrieved from the implanted temperature loggers and consisted of  
783 measurements taken every 30 minutes. Baseline temperature was calculated as the average  
784 temperature in the 5 days before infection. The change in temperature was calculated as deviation  
785 from baseline ( $\Delta T$ ). The area under the curve (AUC) was calculated as the total  $\Delta T$  up till 5 dpi. Values  
786 smaller than 'baseline - 2\*standard deviation of baseline' were excluded as these often occur due to  
787 anesthesia. Relative bodyweight and relative lung weight are expressed as a percentage of  
788 bodyweight or ratio on the day of infection.

789

#### 790 *Data analysis*

791 All the statistical tests carried out aimed at detecting differences between the distributions of  
792 responses in two treatment groups (e.g. H1N1/mRNA and placebo), each response pertaining to a  
793 given stimulus (or measured variable, e.g. body weight) on a given tissue on a given day. The tests  
794 are based on the 'sum statistic' [76] as implemented in the R package 'coin' [77], in the guise of the  
795 function 'independence\_test', possibly with blocking in the event that some experiments were done  
796 on different days (in which case the data from the same experiment are collected in the same block),  
797 and with the (exact) p-values estimated by random permutations. The tests were grouped into  
798 various themes based on tissue and assay (e.g. all stimulations for lung IFN $\gamma$  ELISpot), and the  
799 Benjamini-Hochberg (BH) method [78] was used separately per theme to control the false discovery  
800 rate (FDR) at the level of 10%. Only the results of the tests that passed through the BH method are

801 reported and commented upon in the results section. The overall proportion of spurious results  
802 (over all the themes) is expected to be at most 10% of all those reported. Tables with the complete  
803 results of the tests and multiple testing corrections are available as Supplementary data file 1. The  
804 results reported are illustrated by graphs (e.g. box plots) in the main text or in the online  
805 supplemental material.

806  
807 IFN $\gamma$ -ELISpot spot counts, viral titers, serum titers and cell counts were log-transformed for statistical  
808 testing. We excluded two datapoints of flow cytometry data from data visualization and analysis.  
809 These datapoints (one in PBMC, one in lung) refer to the percentage IFN $\gamma$ <sup>+</sup> within CD4<sup>+</sup> T cells and  
810 were at least two-times higher than the nearest datapoint. No other data was excluded from  
811 analysis.

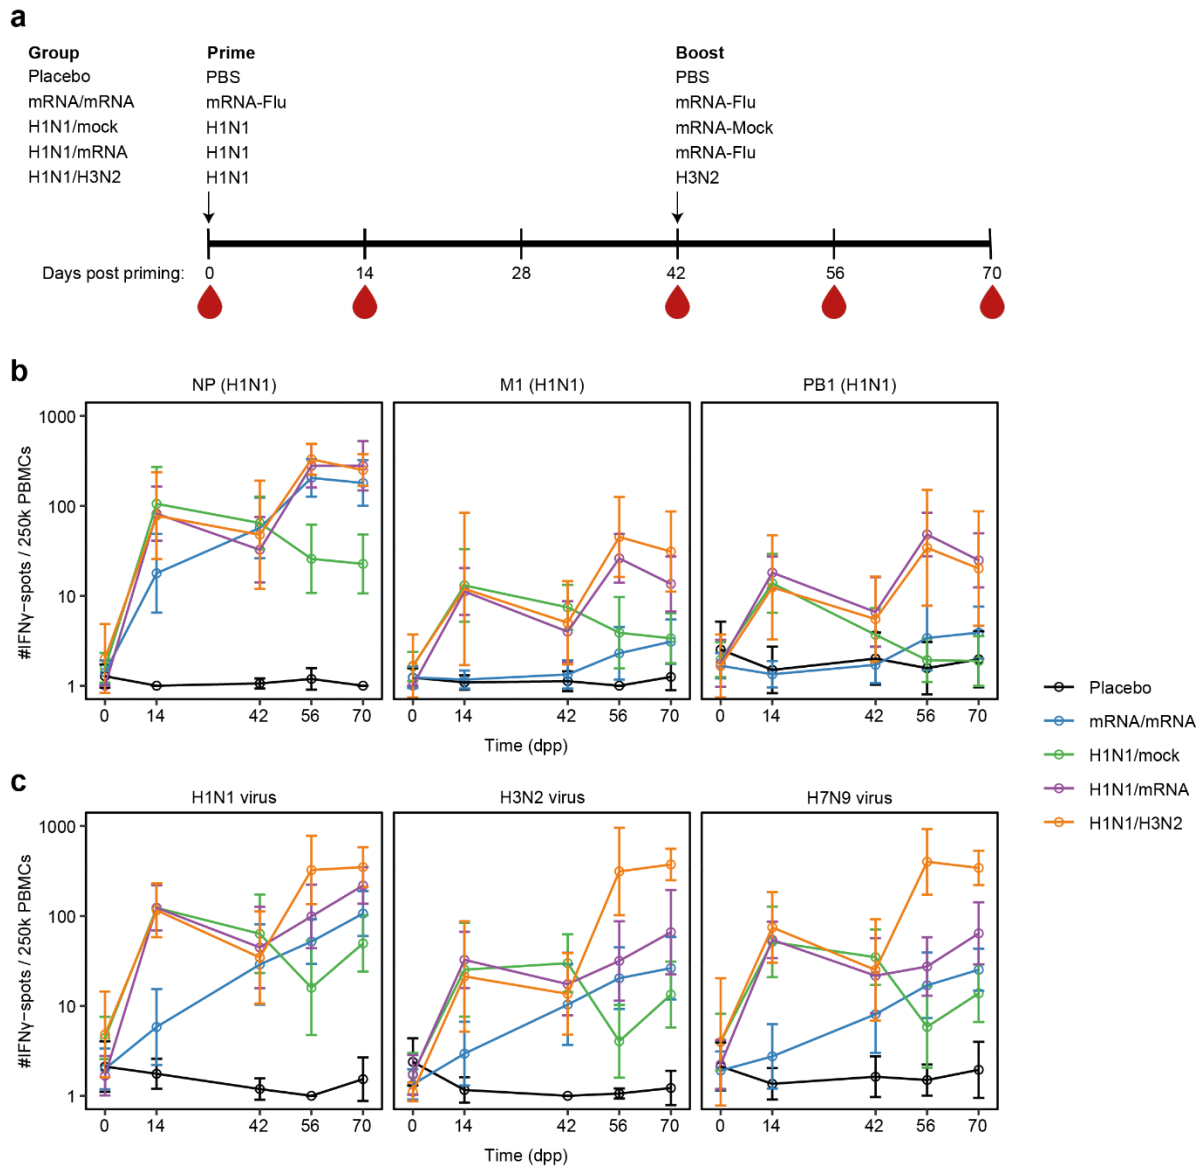

812

813 **Figure 1:** Cellular responses in blood after prime-boost immunization with mRNA-Flu. **a)** Study layout  
 814 depicting the prime-boost strategy. On day 0, ferrets were primed intranasally with PBS,  $10^6$  TCID $_{50}$  H1N1  
 815 influenza virus (A/California/07/2009) or primed intramuscularly with mRNA-LNPs encoding for NP, M1 and  
 816 PB1 (50  $\mu$ g per mRNA-LNP; mRNA-Flu). Ferrets primed with PBS (group placebo) or mRNA-Flu (group  
 817 mRNA/mRNA) received the same treatment as booster 42 days post priming (dpp). H1N1-primed ferrets  
 818 were boosted intramuscularly with mRNA-Flu (H1N1/mRNA-Flu), mRNA-LNP encoding firefly luciferase  
 819 (50  $\mu$ g; H1N1/mock) or boosted intranasally with  $10^6$  TCID $_{50}$  H3N2 influenza virus (H1N1/H3N2;  
 820 A/Uruguay/217/2007). Blood was collected on 0, 14, 42, 56 and 70 dpp. Ferrets were euthanized 70 dpp to  
 821 study cellular responses in tissues. **b, c)** Cellular responses measured by IFN $\gamma$  ELISpot after 20 hours  
 822 stimulation of PBMCs with **b)** H1N1 NP, M1 and PB1 overlapping peptide pools or **c)** live influenza viruses  
 823 H1N1, H3N2 or H7N9 (A/Anhui/1/2013). Data were corrected for medium background and are visualized as  
 824 geometric mean + geometric standard deviation. n = 7 for H1N1/H3N2 and n = 12-14 for all other groups.  
 825 Statistics are detailed in Supplemental data file 1.



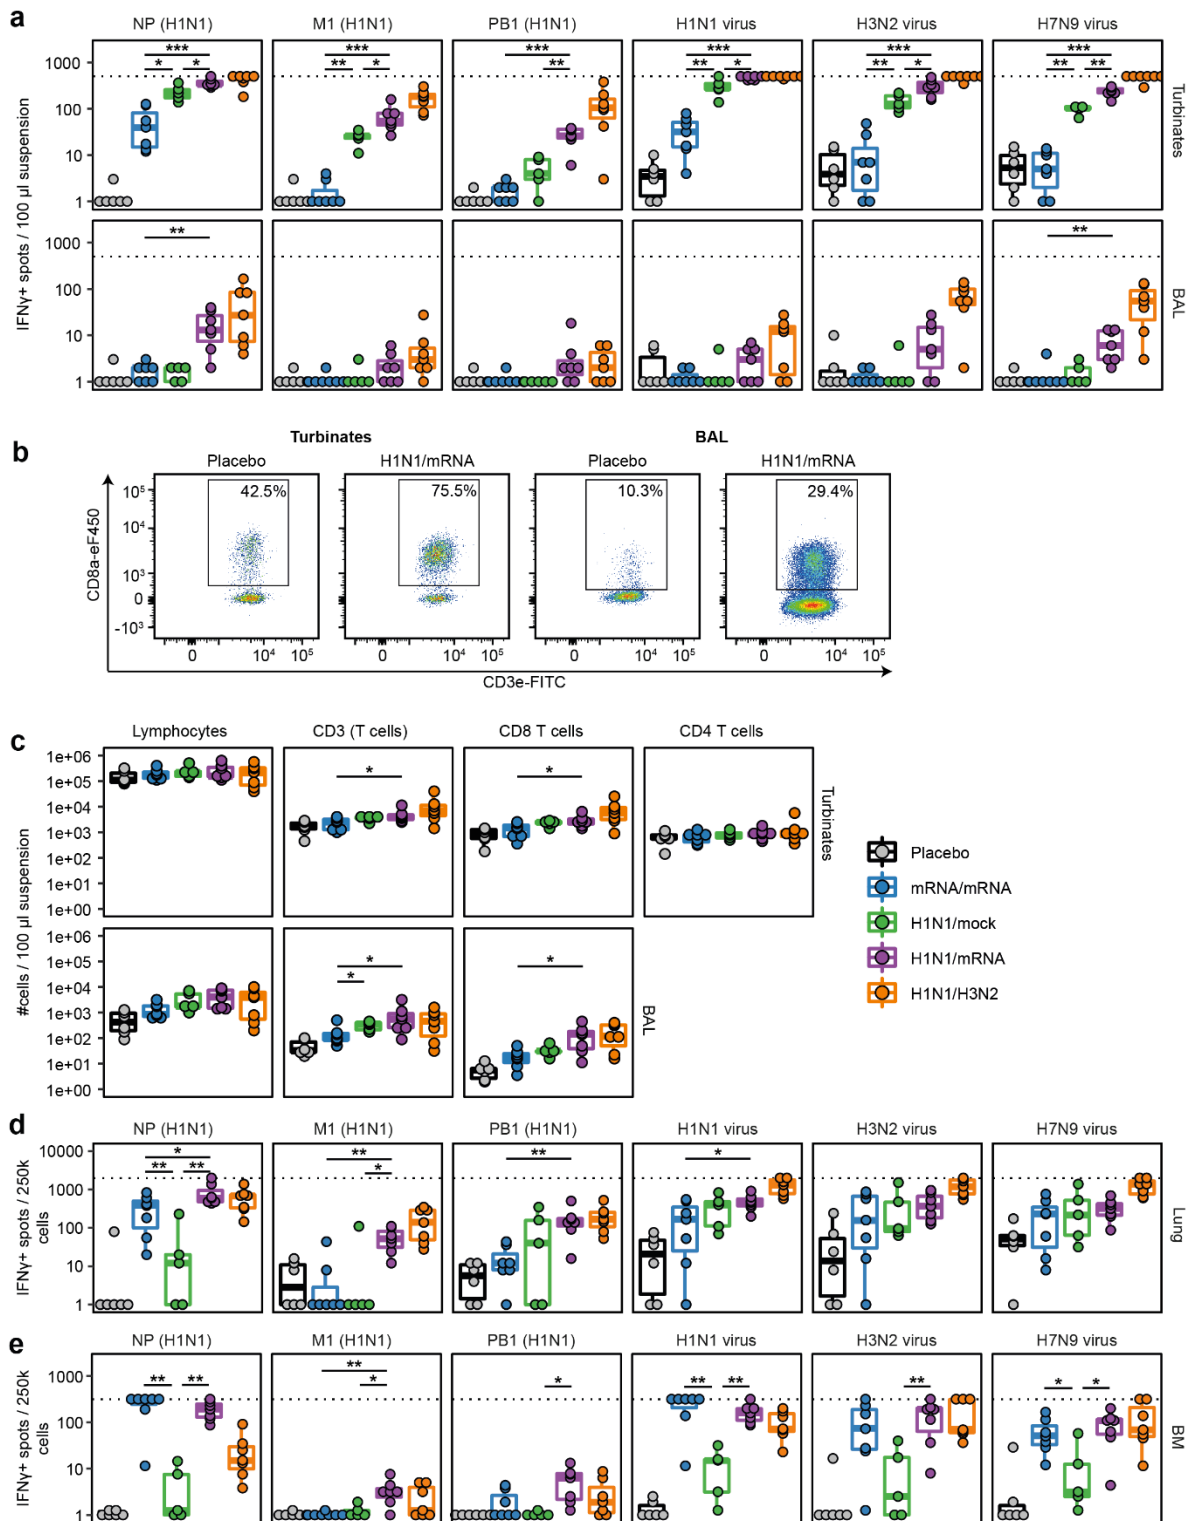

826

827 **Figure 2:** Cellular responses and counts in respiratory compartments and bone marrow of immunized  
 828 ferrets. **a)** Cellular responses measured by IFN $\gamma$  ELISpot after 20 hours stimulation with overlapping H1N1  
 829 peptide pools or live influenza virus using cells derived from nasal turbinates and bronchoalveolar lavage  
 830 (BAL) fluid. **b, c)** Cell counts in nasal turbinates and BAL as measured by flow cytometry. **b)** FACS plot  
 831 displaying the CD8 $^+$  T cell population in representative turbinate and BAL samples. **c)** Count of different cell  
 832 populations per 100  $\mu$ l of suspension. CD4 $^+$  T cell counts are not displayed for BAL as the  $\alpha$ CD4-APC  
 833 staining was not consistent between BAL samples. **d, e)** Cellular responses measured by IFN $\gamma$  ELISpot  
 834 after 20 hours stimulation with overlapping H1N1 peptide pools or live influenza virus of cells derived from  
 835 **d)** lung or **e)** bone marrow (BM). ELISpot data were corrected for medium background. Boxplots depict the  
 836 median, 25% and 75% percentile, where the upper and lower whiskers extend to the smallest and largest

837 value respectively within 1.5\* the inter quartile ranges. In panels a and c-e, each dot represents one animal  
 838 and n = 5-7. For visualization purposes, only comparisons between groups mRNA/mRNA, H1N1/mock and  
 839 H1N1/mRNA are shown. An overview of all statistical comparisons is detailed in Supplemental data file 1. \*  
 840 = p < 0.05, \*\* = p < 0.01, \*\*\* = p < 0.001.

841

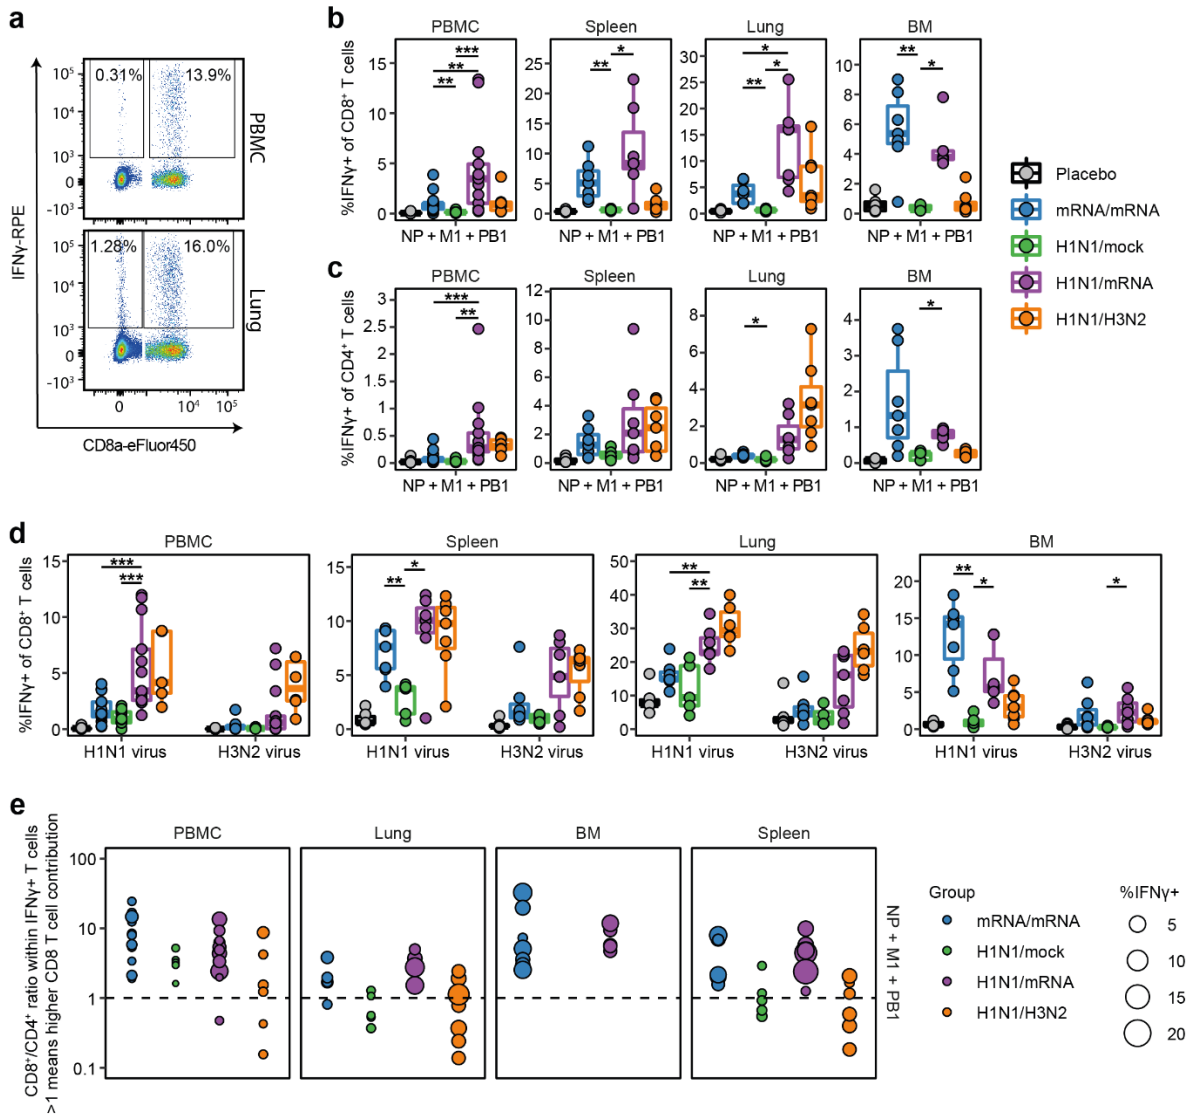

842

843

844 **Figure 3:** IFN $\gamma$  responses of CD4<sup>+</sup> and CD8<sup>+</sup> T cells in PBMC, spleen, lung and bone marrow of immunized  
 845 ferrets. Lymphocytes were stimulated with a peptide cocktail containing H1N1 NP, M1 and PB1 peptide  
 846 pools or live influenza virus. Cells were stained for intracellular IFN $\gamma$  and analyzed by flow cytometry. **a)**  
 847 FACS plots depict representative CD4<sup>+</sup> and CD8<sup>+</sup> T-cell responses of H1N1/mRNA treated ferrets after  
 848 peptide cocktail stimulation. Numbers indicate percentage of CD4<sup>+</sup> or CD8<sup>+</sup> T cells expressing IFN $\gamma$ . **b, c)**  
 849 IFN $\gamma$ -positive CD8<sup>+</sup> (B) and CD4<sup>+</sup> (C) T cells after peptide cocktail stimulation. **d)** Percentage IFN $\gamma$ -positive  
 850 CD8<sup>+</sup> T cells after stimulation with H1N1 (A/California/07/2009) or H3N2 (A/Uruguay/217/2007) influenza  
 851 viruses. **e)** Ratio between CD8<sup>+</sup> and CD4<sup>+</sup> T cells within the CD3<sup>+</sup> IFN $\gamma$ + T-cell population after peptide  
 852 cocktail stimulation. Dotted line represents a ratio of 1 and samples with less than 50 CD3<sup>+</sup> IFN $\gamma$ + cells  
 853 were excluded from the analysis. Each dot represents one ferret and the dot size is relative to the total  
 854 IFN $\gamma$  response (%IFN $\gamma$ + of CD4<sup>+</sup> and CD8<sup>+</sup> T cells). Boxplots depict the median, 25% and 75% percentile,  
 855 where the upper and lower whiskers extend to the smallest and largest value respectively within 1.5\* the  
 856 inter quartile ranges. In panels b-e, each dot represents one animal. n = 4-13 for PBMC and n = 4-7 for  
 857 lung, spleen and BM. For visualization purposes, only comparisons between groups mRNA/mRNA,  
 858 H1N1/mock and H1N1/mRNA are shown. No statistics were performed for panel e. An overview of all  
 859 statistical comparisons is detailed in Supplemental data file 1. \* = p < 0.05, \*\* = p < 0.01, \*\*\* = p < 0.001.

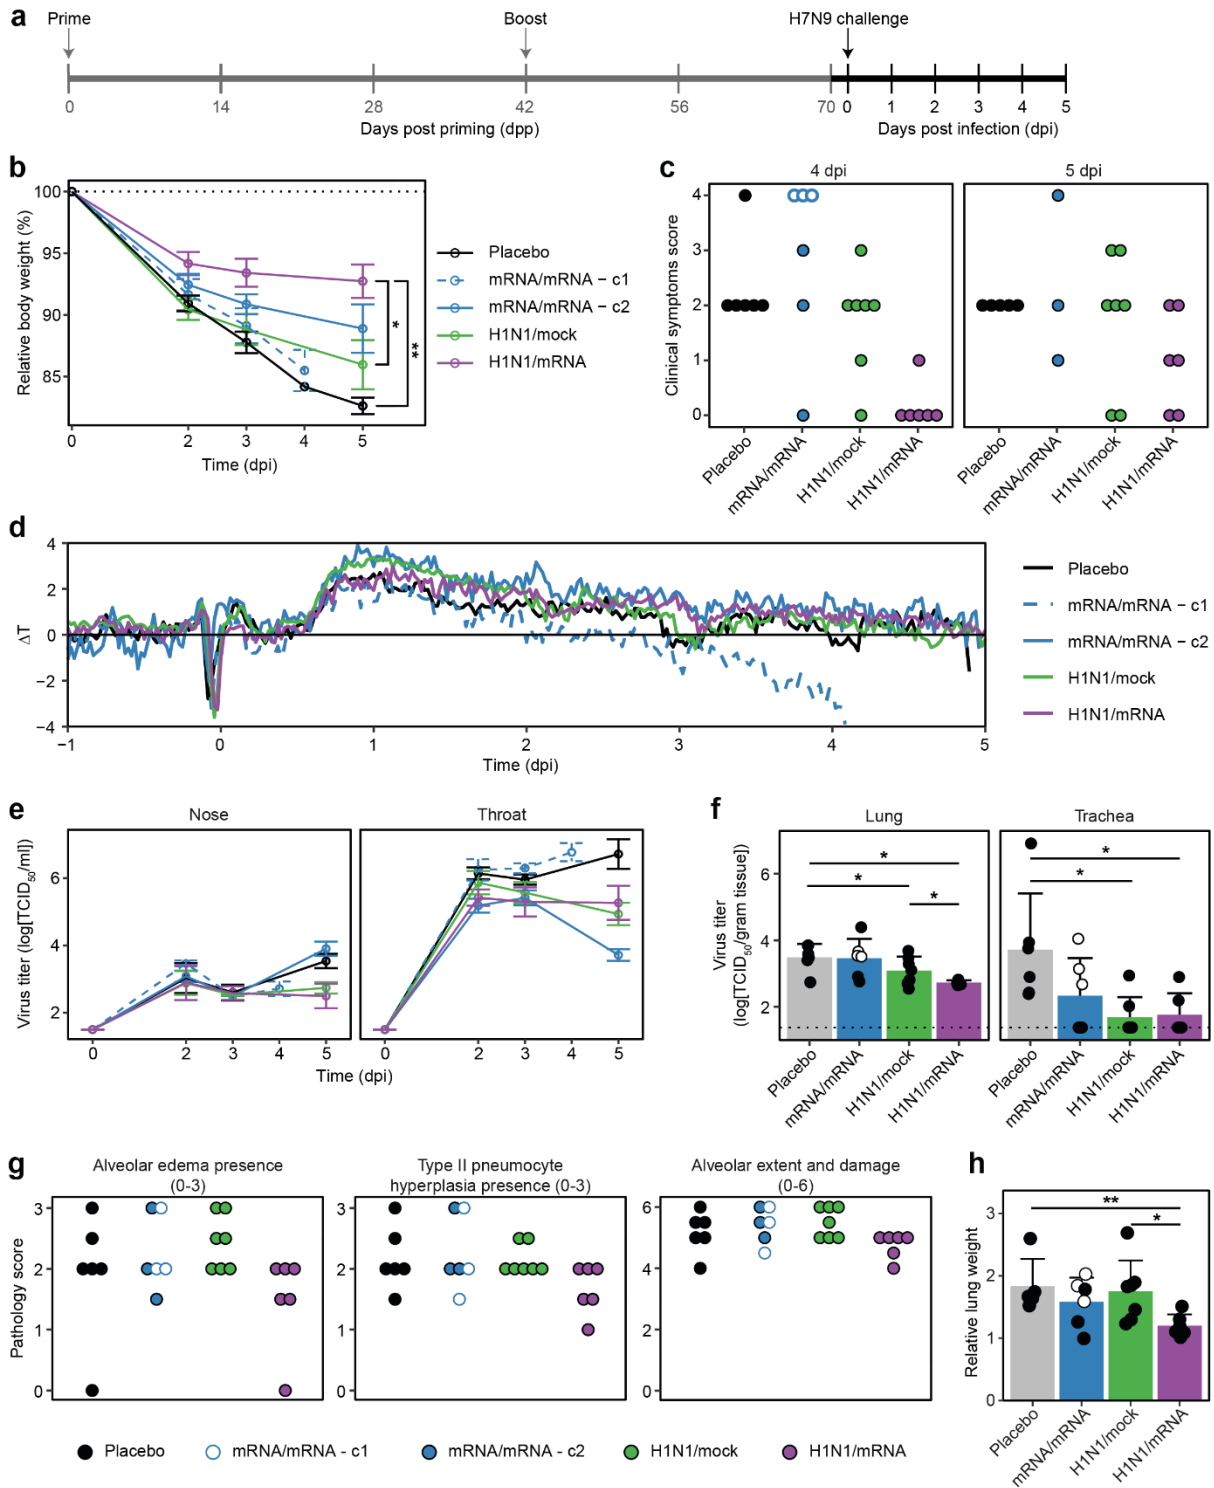

861  
862

863 **Figure 4:** Boosting of existing immunity increases protection against H7N9 influenza virus challenge. **a)**  
 864 Study layout depicting the H7N9 influenza virus challenge after different prime-boost regimens. Ferrets  
 865 were challenged intratracheally with  $10^6$  TCID<sub>50</sub> A/Anhui/1/2013 (H7N9) influenza virus at 71 or 72 days  
 866 post priming (dpp), which equals 0 days post infection (0 dpi). At 5 dpi, animals were euthanized after  
 867 which pathology and virology was assessed. **b)** Decrease in body weight from 0 to 5 dpi. Body weight is  
 868 depicted relative to body weight (%) on the day of challenge. **c)** Clinical scoring for parameters activity and  
 869 breathing as detailed in the Materials & Methods. Ferrets reaching a combined score of 4 have reached the  
 870 human endpoints and were euthanized. **d)** Fever depicted as temperature deviation from baseline.  
 871 Baseline was determined as average body temperature from -5 to -1 dpi. **e, f)** Viral titers (TCID<sub>50</sub>) in **e)**  
 872 nose and throat swabs and **f)** homogenized lung and trachea tissue as determined by endpoint titration on  
 873 MDCK cells. Dotted line in panel f indicates the limit of detection. **g)** Pathology scoring for selected  
 874 parameters as detailed in the Materials & Methods. **h)** Lung weight 5 dpi relative to body weight on the day  
 875 of infection. For all panels n = 6-7. In panels b, e, f, and h, data are visualized as mean  $\pm$  SD. In panel d,  
 876 data is shown as group mean. In panels c and f-h, dots represent individual observations of ferrets. One  
 877 placebo ferret and three mRNA/mRNA treated ferrets needed to be euthanized 4 dpi due to reaching the  
 878 humane endpoints. The mRNA/mRNA ferrets euthanized 4 dpi are visualized as separate groups or  
 879 depicted by open symbols (instead of filled). For visualization purposes, only comparisons between groups  
 880 placebo, H1N1/mock and H1N1/mRNA are shown. No statistics were performed for panels c and g, as  
 881 these are nominal data. An overview of all statistical comparisons is detailed in Supplemental data file 1. \*  
 882 = p < 0.05, \*\* = p < 0.01, \*\*\* = p < 0.001.  
 883

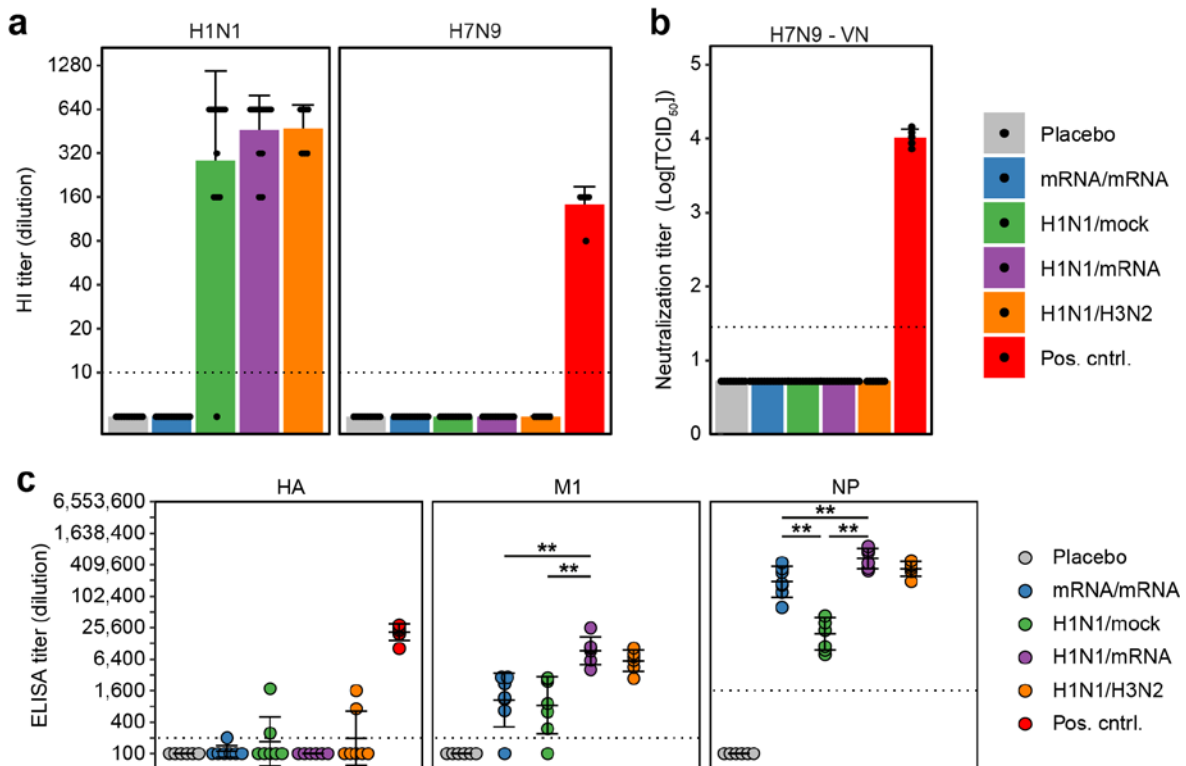

884

885

886 **Figure 5:** Antibody responses against H1N1 and H7N9 influenza viruses in sera obtained 70 days post  
 887 priming (dpp). **a)** Antibodies against H1N1 (A/California/07/2009) or H7N9 (H7N9/PR8 reassortant)  
 888 influenza virus, measured by hemagglutination inhibition (HI) assay. **b)** Virus neutralization titer against  
 889 H7N9 influenza virus **c)** Antibodies binding to recombinant HA, M1 or NP of A/Anhui/1/2013 (H7N9)  
 890 influenza virus measured by ELISA. The antibody titer is calculated as the extrapolated dilution of serum at  
 891 which the OD 450 drops below background (mean of placebo animals + 3x SD). Positive control samples  
 892 are sera from ferrets previously vaccinated twice with an H7N9 live attenuated virus [79]. Dotted line  
 893 represents the lower limit of detection (a, b) or the background cut-off (c). In panels a-c, each dot  
 894 represents one animal. For panels a and b, n = 7-14 (experimental groups) or n = 5 (positive control); for  
 895 panel c, n = 6-7. For visualization purposes, only comparisons between groups mRNA/mRNA, H1N1/mock  
 896 and H1N1/mRNA are shown in panel c. An overview of all statistical comparisons is detailed in  
 897 Supplemental data file 1. \* = p < 0.05, \*\* = p < 0.01, \*\*\* = p < 0.001.

898 **References**

899

- 900 1. Iuliano, A.D., et al., *Estimates of global seasonal influenza-associated respiratory mortality: a*  
901 *modelling study*. Lancet, 2018. **391**(10127): p. 1285-1300.
- 902 2. Paget, J., et al., *Global mortality associated with seasonal influenza epidemics: New burden*  
903 *estimates and predictors from the GLaMOR Project*. J Glob Health, 2019. **9**(2): p. 020421.
- 904 3. Ramsay, L.C., et al., *The impact of repeated vaccination on influenza vaccine effectiveness: a*  
905 *systematic review and meta-analysis*. BMC Med, 2017. **15**(1): p. 159.
- 906 4. Russell, K., et al., *Influenza vaccine effectiveness in older adults compared with younger*  
907 *adults over five seasons*. Vaccine, 2018. **36**(10): p. 1272-1278.
- 908 5. Osterholm, M.T., et al., *Efficacy and effectiveness of influenza vaccines: a systematic review*  
909 *and meta-analysis*. Lancet Infect Dis, 2012. **12**(1): p. 36-44.
- 910 6. Taubenberger, J.K., et al., *Characterization of the 1918 influenza virus polymerase genes*.  
911 Nature, 2005. **437**(7060): p. 889-93.
- 912 7. Worobey, M., G.Z. Han, and A. Rambaut, *Genesis and pathogenesis of the 1918 pandemic*  
913 *H1N1 influenza A virus*. Proceedings of the National Academy of Sciences, 2014. **111**(22): p.  
914 8107-8112.
- 915 8. Ke, C., et al., *Human Infection with Highly Pathogenic Avian Influenza A(H7N9) Virus, China*.  
916 Emerg Infect Dis, 2017. **23**(8): p. 1332-1340.
- 917 9. WHO. *Cumulative number of confirmed human cases of avian influenza A(H5N1) reported to*  
918 *WHO*. 2020 [cited 2021 25-5-2021]; Available from:  
919 [https://www.who.int/influenza/human\\_animal\\_interface/H5N1\\_cumulative\\_table\\_archives](https://www.who.int/influenza/human_animal_interface/H5N1_cumulative_table_archives/en/)  
920 [/en/](https://www.who.int/influenza/human_animal_interface/H5N1_cumulative_table_archives/en/).
- 921 10. Health, T.W.O.f.A., *High Pathogenicity Avian Influenza (HPAI)- Situation Report*. 2022. p. 1-7.
- 922 11. Herfst, S., et al., *Airborne transmission of influenza A/H5N1 virus between ferrets*. Science,  
923 2012. **336**(6088): p. 1534-41.
- 924 12. Linster, M., et al., *Identification, characterization, and natural selection of mutations driving*  
925 *airborne transmission of A/H5N1 virus*. Cell, 2014. **157**(2): p. 329-339.
- 926 13. Imai, M., et al., *Experimental adaptation of an influenza H5 HA confers respiratory droplet*  
927 *transmission to a reassortant H5 HA/H1N1 virus in ferrets*. Nature, 2012. **486**(7403): p. 420-  
928 8.
- 929 14. Krammer, F. and P. Palese, *Advances in the development of influenza virus vaccines*. Nat Rev  
930 Drug Discov, 2015. **14**(3): p. 167-82.
- 931 15. Nachbagauer, R. and P. Palese, *Is a Universal Influenza Virus Vaccine Possible?* Annu Rev  
932 Med, 2020. **71**: p. 315-327.
- 933 16. van de Sandt, C.E., et al., *Human cytotoxic T lymphocytes directed to seasonal influenza A*  
934 *viruses cross-react with the newly emerging H7N9 virus*. J Virol, 2014. **88**(3): p. 1684-93.
- 935 17. Tu, W., et al., *Cytotoxic T lymphocytes established by seasonal human influenza cross-react*  
936 *against 2009 pandemic H1N1 influenza virus*. J Virol, 2010. **84**(13): p. 6527-35.
- 937 18. Grant, E.J., et al., *Broad CD8(+) T cell cross-recognition of distinct influenza A strains in*  
938 *humans*. Nat Commun, 2018. **9**(1): p. 5427.
- 939 19. Koutsakos, M., K. Kedzierska, and K. Subbarao, *Immune Responses to Avian Influenza*  
940 *Viruses*. J Immunol, 2019. **202**(2): p. 382-391.
- 941 20. Jansen, J.M., et al., *Influenza virus-specific CD4+ and CD8+ T cell-mediated immunity induced*  
942 *by infection and vaccination*. J Clin Virol, 2019. **119**: p. 44-52.
- 943 21. Sridhar, S., et al., *Cellular immune correlates of protection against symptomatic pandemic*  
944 *influenza*. Nat Med, 2013. **19**(10): p. 1305-12.
- 945 22. Wilkinson, T.M., et al., *Preexisting influenza-specific CD4+ T cells correlate with disease*  
946 *protection against influenza challenge in humans*. Nat Med, 2012. **18**(2): p. 274-80.
- 947 23. Wang, Z., et al., *Recovery from severe H7N9 disease is associated with diverse response*  
948 *mechanisms dominated by CD8(+) T cells*. Nat Commun, 2015. **6**: p. 6833.



- 949 24. Bodewes, R., et al., *Infection of the upper respiratory tract with seasonal influenza A(H3N2)*  
950 *virus induces protective immunity in ferrets against infection with A(H1N1)pdm09 virus after*  
951 *intranasal, but not intratracheal, inoculation.* J Virol, 2013. **87**(8): p. 4293-301.
- 952 25. van de Ven, K., et al., *Systemic and respiratory T-cells induced by seasonal H1N1 influenza*  
953 *protect against pandemic H2N2 in ferrets.* Commun Biol, 2020. **3**(1): p. 564.
- 954 26. Gooch, K.E., et al., *Heterosubtypic cross-protection correlates with cross-reactive interferon-*  
955 *gamma-secreting lymphocytes in the ferret model of influenza.* Sci Rep, 2019. **9**(1): p. 2617.
- 956 27. Bodewes, R., et al., *Vaccination against seasonal influenza A/H3N2 virus reduces the*  
957 *induction of heterosubtypic immunity against influenza A/H5N1 virus infection in ferrets.* J  
958 Virol, 2011. **85**(6): p. 2695-702.
- 959 28. Van Braeckel-Budimir, N., et al., *Repeated Antigen Exposure Extends the Durability of*  
960 *Influenza-Specific Lung-Resident Memory CD8(+) T Cells and Heterosubtypic Immunity.* Cell  
961 Rep, 2018. **24**(13): p. 3374-3382 e3.
- 962 29. Slütter, B., et al., *Dynamics of influenza-induced lung-resident memory T cells underlie*  
963 *waning heterosubtypic immunity.* Sci Immunol, 2017. **2**(7).
- 964 30. Eickhoff, C.S., et al., *Highly conserved influenza T cell epitopes induce broadly protective*  
965 *immunity.* Vaccine, 2019. **37**(36): p. 5371-5381.
- 966 31. Pardi, N., et al., *mRNA vaccines - a new era in vaccinology.* Nat Rev Drug Discov, 2018. **17**(4):  
967 p. 261-279.
- 968 32. Scorza, F.B. and N. Pardi, *New Kids on the Block: RNA-Based Influenza Virus Vaccines.*  
969 Vaccines (Basel), 2018. **6**(2).
- 970 33. Hogan, M.J. and N. Pardi, *mRNA Vaccines in the COVID-19 Pandemic and Beyond.* Annu Rev  
971 Med, 2021.
- 972 34. Oberhardt, V., et al., *Rapid and stable mobilization of CD8(+) T cells by SARS-CoV-2 mRNA*  
973 *vaccine.* Nature, 2021. **597**(7875): p. 268-273.
- 974 35. Wang, Z., et al., *mRNA vaccine-elicited antibodies to SARS-CoV-2 and circulating variants.*  
975 Nature, 2021. **592**(7855): p. 616-622.
- 976 36. Amanat, F., et al., *SARS-CoV-2 mRNA vaccination induces functionally diverse antibodies to*  
977 *NTD, RBD, and S2.* Cell, 2021. **184**(15): p. 3936-3948 e10.
- 978 37. Sahin, U., et al., *COVID-19 vaccine BNT162b1 elicits human antibody and TH1 T cell*  
979 *responses.* Nature, 2020. **586**(7830): p. 594-599.
- 980 38. Zollner, A., et al., *B and T cell response to SARS-CoV-2 vaccination in health care*  
981 *professionals with and without previous COVID-19.* EBioMedicine, 2021. **70**: p. 103539.
- 982 39. Pardi, N., M.J. Hogan, and D. Weissman, *Recent advances in mRNA vaccine technology.* Curr  
983 Opin Immunol, 2020. **65**: p. 14-20.
- 984 40. Freyn, A.W., et al., *A Multi-Targeting, Nucleoside-Modified mRNA Influenza Virus Vaccine*  
985 *Provides Broad Protection in Mice.* Mol Ther, 2020. **28**(7): p. 1569-1584.
- 986 41. Feldman, R.A., et al., *mRNA vaccines against H10N8 and H7N9 influenza viruses of pandemic*  
987 *potential are immunogenic and well tolerated in healthy adults in phase 1 randomized*  
988 *clinical trials.* Vaccine, 2019. **37**(25): p. 3326-3334.
- 989 42. Bahl, K., et al., *Preclinical and Clinical Demonstration of Immunogenicity by mRNA Vaccines*  
990 *against H10N8 and H7N9 Influenza Viruses.* Mol Ther, 2017. **25**(6): p. 1316-1327.
- 991 43. Zhuang, X., et al., *mRNA Vaccines Encoding the HA Protein of Influenza A H1N1 Virus*  
992 *Delivered by Cationic Lipid Nanoparticles Induce Protective Immune Responses in Mice.*  
993 Vaccines (Basel), 2020. **8**(1).
- 994 44. Hayward, A.C., et al., *Natural T cell-mediated protection against seasonal and pandemic*  
995 *influenza: Results of the flu watch cohort study.* American Journal of Respiratory and Critical  
996 Care Medicine, 2015. **191**: p. 1422-1431.
- 997 45. Pardi, N., et al., *Expression kinetics of nucleoside-modified mRNA delivered in lipid*  
998 *nanoparticles to mice by various routes.* J Control Release, 2015. **217**: p. 345-51.



- 999 46. Pizzolla, A., et al., *Resident memory CD8(+) T cells in the upper respiratory tract prevent*  
1000 *pulmonary influenza virus infection*. *Sci Immunol*, 2017. **2**(12).
- 1001 47. Chang, H.D. and A. Radbruch, *Maintenance of quiescent immune memory in the bone*  
1002 *marrow*. *Eur J Immunol*, 2021. **51**(7): p. 1592-1601.
- 1003 48. Dolgin, E., *mRNA flu shots move into trials*. *Nature Reviews Drug Discovery*, 2021. **20**(11): p.  
1004 801-803.
- 1005 49. Su, S., et al., *Epidemiology, Evolution, and Pathogenesis of H7N9 Influenza Viruses in Five*  
1006 *Epidemic Waves since 2013 in China*. *Trends Microbiol*, 2017. **25**(9): p. 713-728.
- 1007 50. Wu, T., et al., *Lung-resident memory CD8 T cells (TRM) are indispensable for optimal cross-*  
1008 *protection against pulmonary virus infection*. *J Leukoc Biol*, 2014. **95**(2): p. 215-24.
- 1009 51. Zens, K.D., J.K. Chen, and D.L. Farber, *Vaccine-generated lung tissue-resident memory T cells*  
1010 *provide heterosubtypic protection to influenza infection*. *JCI Insight*, 2016. **1**.
- 1011 52. Laczko, D., et al., *A Single Immunization with Nucleoside-Modified mRNA Vaccines Elicits*  
1012 *Strong Cellular and Humoral Immune Responses against SARS-CoV-2 in Mice*. *Immunity*,  
1013 2020. **53**(4): p. 724-732 e7.
- 1014 53. Li, M., et al., *Enhanced intranasal delivery of mRNA vaccine by overcoming the nasal*  
1015 *epithelial barrier via intra- and paracellular pathways*. *J Control Release*, 2016. **228**: p. 9-19.
- 1016 54. Feuerer, M., et al., *Bone marrow as a priming site for T-cell responses to blood-borne*  
1017 *antigen*. *Nat Med*, 2003. **9**(9): p. 1151-7.
- 1018 55. Duffy, D., et al., *Neutrophils transport antigen from the dermis to the bone marrow, initiating*  
1019 *a source of memory CD8+ T cells*. *Immunity*, 2012. **37**(5): p. 917-29.
- 1020 56. Di Rosa, F. and R. Pabst, *The bone marrow: a nest for migratory memory T cells*. *Trends*  
1021 *Immunol*, 2005. **26**(7): p. 360-6.
- 1022 57. Pascutti, M.F., et al., *Peripheral and systemic antigens elicit an expandable pool of resident*  
1023 *memory CD8(+) T cells in the bone marrow*. *Eur J Immunol*, 2019. **49**(6): p. 853-872.
- 1024 58. Naaber, P., et al., *Dynamics of antibody response to BNT162b2 vaccine after six months: a*  
1025 *longitudinal prospective study*. *Lancet Reg Health Eur*, 2021. **10**: p. 100208.
- 1026 59. Naranbhai, V., et al., *Comparative immunogenicity and effectiveness of mRNA-1273,*  
1027 *BNT162b2 and Ad26.COV2.S COVID-19 vaccines*. *J Infect Dis*, 2021.
- 1028 60. Carragher, D.M., et al., *A novel role for non-neutralizing antibodies against nucleoprotein in*  
1029 *facilitating resistance to influenza virus*. *J Immunol*, 2008. **181**(6): p. 4168-76.
- 1030 61. LaMere, M.W., et al., *Contributions of antinucleoprotein IgG to heterosubtypic immunity*  
1031 *against influenza virus*. *J Immunol*, 2011. **186**(7): p. 4331-9.
- 1032 62. Jegaskanda, S., et al., *Induction of H7N9-Cross-Reactive Antibody-Dependent Cellular*  
1033 *Cytotoxicity Antibodies by Human Seasonal Influenza A Viruses that are Directed Toward the*  
1034 *Nucleoprotein*. *J Infect Dis*, 2017. **215**(5): p. 818-823.
- 1035 63. Vanderven, H.A., et al., *What Lies Beneath: Antibody Dependent Natural Killer Cell Activation*  
1036 *by Antibodies to Internal Influenza Virus Proteins*. *EBioMedicine*, 2016. **8**: p. 277-290.
- 1037 64. Oh, D.Y. and A.C. Hurt, *Using the Ferret as an Animal Model for Investigating Influenza*  
1038 *Antiviral Effectiveness*. *Front Microbiol*, 2016. **7**: p. 80.
- 1039 65. Polack, F.P., et al., *Safety and Efficacy of the BNT162b2 mRNA Covid-19 Vaccine*. *N Engl J*  
1040 *Med*, 2020. **383**(27): p. 2603-2615.
- 1041 66. Baden, L.R., et al., *Efficacy and Safety of the mRNA-1273 SARS-CoV-2 Vaccine*. *N Engl J Med*,  
1042 2021. **384**(5): p. 403-416.
- 1043 67. Smetana, J., et al., *Influenza vaccination in the elderly*. *Hum Vaccin Immunother*, 2018. **14**(3):  
1044 p. 540-549.
- 1045 68. Freyn, A.W., et al., *Antigen modifications improve nucleoside-modified mRNA-based*  
1046 *influenza virus vaccines in mice*. *Mol Ther Methods Clin Dev*, 2021. **22**: p. 84-95.
- 1047 69. Baidersdorfer, M., et al., *A Facile Method for the Removal of dsRNA Contaminant from In*  
1048 *Vitro-Transcribed mRNA*. *Mol Ther Nucleic Acids*, 2019. **15**: p. 26-35.

- 1049 70. van de Ven, K., et al., *Pathology and Immunity After SARS-CoV-2 Infection in Male Ferrets Is*  
1050 *Affected by Age and Inoculation Route*. *Frontiers in Immunology*, 2021. **12**.
- 1051 71. R Core Team, *R: A Language and Environment for Statistical Computing*. 2021, R Foundation  
1052 for Statistical Computing.
- 1053 72. World Health, O., *Manual for the laboratory diagnosis and virological surveillance of*  
1054 *influenza*. 2011, World Health Organization: Geneva.
- 1055 73. de Jonge, J., et al., *H7N9 influenza split vaccine with SWE oil-in-water adjuvant greatly*  
1056 *enhances cross-reactive humoral immunity and protection against severe pneumonia in*  
1057 *ferrets*. *NPJ Vaccines*, 2020. **5**(1): p. 38.
- 1058 74. Reed LJ, M.H., *A simple method of estimating fifty per cent endpoints*. *The American Journal*  
1059 *of Hygiene*, 1938. **27**: p. 493–497.
- 1060 75. van den Brand, J.M., et al., *Efficacy of vaccination with different combinations of MF59-*  
1061 *adjuvanted and nonadjuvanted seasonal and pandemic influenza vaccines against pandemic*  
1062 *H1N1 (2009) influenza virus infection in ferrets*. *J Virol*, 2011. **85**(6): p. 2851-8.
- 1063 76. Rosenbaum, P.R., *Observational Studies*. Springer Series in Statistics. 2002.
- 1064 77. Hothorn, T., et al., *Implementing a Class of Permutation Tests: ThecoinPackage*. *Journal of*  
1065 *Statistical Software*, 2008. **28**(8): p. 23.
- 1066 78. Benjamini, Y. and Y. Hochberg, *Controlling the False Discovery Rate: A Practical and Powerful*  
1067 *Approach to Multiple Testing*. *Journal of the Royal Statistical Society. Series B*  
1068 *(Methodological)*, 1995. **57**(1): p. 289-300.
- 1069 79. de Jonge, J., et al., *H7N9 Live Attenuated Influenza Vaccine Is Highly Immunogenic, Prevents*  
1070 *Virus Replication, and Protects Against Severe Bronchopneumonia in Ferrets*. *Mol Ther*, 2016.  
1071 **24**(5): p. 991-1002.
- 1072
